# Supplementary material for: α-Substituted acylsilanes via a highly selective [1,4]-Wittig rearrangement of α-benzyloxyallylsilane
Source: Royal Society of Chemistry journal article supplement (doi:10.1039/b603228a), 2006-01-01

**$\alpha$ -Substituted Acylsilanes via a Highly Selective [1,4]-Wittig  
Rearrangement of  $\alpha$ -Benzyloxyallylsilane**

Edith N. Onyeozili and Robert E. Maleczka, Jr.\*

Department of Chemistry, Michigan State University, East Lansing, Michigan 48824 USA

E-mail: [maleczka@chemistry.msu.edu](mailto:maleczka@chemistry.msu.edu)

**Supporting Information**

**Contents:**

|                                                                                                                                                                            |              |
|----------------------------------------------------------------------------------------------------------------------------------------------------------------------------|--------------|
| <b>Materials and methods</b> .....                                                                                                                                         | <b>S2</b>    |
| <b>Wittig rearrangements of <math>\alpha</math>-benzyloxyallylsilane (1) and subsequent trapping experiments.</b>                                                          |              |
| <b>Experimental details and spectroscopic data:</b> .....                                                                                                                  | <b>S2–S7</b> |
| <b><math>^1\text{H-NMR}</math> Spectrum of 2-phenethyl-1-(trimethylsilyl)pent-4-en-1-one (5).....</b>                                                                      | <b>S8</b>    |
| <b><math>^{13}\text{C-NMR}</math> Spectrum of 2-phenethyl-1-(trimethylsilyl)pent-4-en-1-one (5).....</b>                                                                   | <b>S9</b>    |
| <b><math>^1\text{H-NMR}</math> Spectrum of 2-benzyl-4-phenyl-1-(trimethylsilyl)butan-1-one (6).....</b>                                                                    | <b>S10</b>   |
| <b><math>^{13}\text{C-NMR}</math> Spectrum of 2-benzyl-4-phenyl-1-(trimethylsilyl)butan-1-one (6).....</b>                                                                 | <b>S11</b>   |
| <b><math>^1\text{H-NMR}</math> Spectrum of 2-methyl-4-phenyl-1-(trimethylsilyl)butan-1-one (7).....</b>                                                                    | <b>S12</b>   |
| <b><math>^{13}\text{C-NMR}</math> Spectrum of 2-methyl-4-phenyl-1-(trimethylsilyl)butan-1-one (7).....</b>                                                                 | <b>S13</b>   |
| <b><math>^1\text{H-NMR}</math> Spectrum of 2-ethyl-4-phenyl-1-(trimethylsilyl)butan-1-one (8) and (<i>E</i>)-(1-ethoxy)-4-phenylbut-1-enyl)trimethylsilane (9).....</b>    | <b>S14</b>   |
| <b><math>^{13}\text{C-NMR}</math> Spectrum of 2-ethyl-4-phenyl-1-(trimethylsilyl)butan-1-one (8) and (<i>E</i>)-(1-ethoxy)-4-phenylbut-1-enyl)trimethylsilane (9).....</b> | <b>S15</b>   |
| <b><math>^1\text{H-NMR}</math> Spectrum of 2-phenethyl-1-(trimethylsilyl)pentan-1-one (10).....</b>                                                                        | <b>S16</b>   |
| <b><math>^{13}\text{C-NMR}</math> Spectrum of 2-phenethyl-1-(trimethylsilyl)pentan-1-one (10).....</b>                                                                     | <b>S17</b>   |
| <b><math>^1\text{H-NMR}</math> Spectrum of (<i>E</i>)-trimethyl(4-phenyl-1-propoxybut-1-enyl)silane (11).....</b>                                                          | <b>S18</b>   |
| <b><math>^{13}\text{C-NMR}</math> Spectrum of (<i>E</i>)-trimethyl(4-phenyl-1-propoxybut-1-enyl)silane (11).....</b>                                                       | <b>S19</b>   |
| <b><math>^1\text{H-NMR}</math> Spectrum of (<i>E</i>)-1-(4-(trimethylsilyl)-4-(trimethylsilyloxy)but-3-enyl)benzene (12).....</b>                                          | <b>S20</b>   |
| <b><math>^{13}\text{C-NMR}</math> Spectrum of (<i>E</i>)-1-(4-(trimethylsilyl)-4-(trimethylsilyloxy)but-3-enyl)benzene (12).....</b>                                       | <b>S21</b>   |
| <b><math>^1\text{H-NMR}</math> Spectrum of (<i>E</i>)-4-phenyl-1-(trimethylsilyl)but-1-enyl acetate (13).....</b>                                                          | <b>S22</b>   |
| <b><math>^{13}\text{C-NMR}</math> Spectrum of (<i>E</i>)-4-phenyl-1-(trimethylsilyl)but-1-enyl acetate (13).....</b>                                                       | <b>S23</b>   |
| <b><math>^1\text{H-NMR}</math> Spectrum of trimethyl(4-phenylbut-1-ynyl)silane (14).....</b>                                                                               | <b>S24</b>   |
| <b><math>^{13}\text{C-NMR}</math> Spectrum of trimethyl(4-phenylbut-1-ynyl)silane (14).....</b>                                                                            | <b>S25</b>   |

**Materials and Methods:** All air or moisture sensitive reactions were carried out in oven- or flame-dried glassware under nitrogen atmosphere, unless otherwise noted. All solvents were reagent grade. Anhydrous diethyl ether and tetrahydrofuran (THF) were freshly distilled under nitrogen from sodium benzophenoneketyl. Dichloromethane and triethylamine were freshly distilled from calcium hydride under nitrogen. Methylolithium, *n*-butyllithium, *sec*-butyllithium, and *tert*-butyllithium were purchased from Aldrich as diethyl ether, hexane, cyclohexane, and pentane solutions respectively. Except as otherwise indicated, all reactions were magnetically stirred and monitored by thin layer chromatography with 0.25-mm precoated silica gel plates. Flash chromatography was performed with silica gel 60 Å (particle size 230-400 Mesh ASTM). Yields refer to chromatographically and spectroscopically pure compounds, unless otherwise stated. Proton and carbon NMR spectra were recorded on a 300 or 500 MHz spectrometer. Chemical shifts for  $^1\text{H}$  NMR and  $^{13}\text{C}$  NMR are reported in parts per million (ppm) relative to  $\text{CDCl}_3$  ( $\delta = 7.24$  ppm for  $^1\text{H}$  NMR or  $\delta = 77.0$  ppm for  $^{13}\text{C}$  NMR).

**Wittig rearrangements of  $\alpha$ -benzyloxyallylsilane (1) and subsequent trapping experiments.  
Experimental details and spectroscopic data:**

**Preparation of (2-phenethyl-1-(trimethylsilyl)pent-4-en-1-one) (5) (Table 2, Entry 1):**

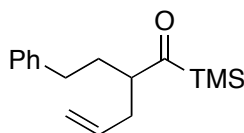

A solution of  $\alpha$ -benzyloxyallylsilane (1) (106 mg, 0.48 mmol) in THF (0.065 M) was cooled to  $-78$  °C under nitrogen. *s*-BuLi (1.3 M in cyclohexane, 1.5 equiv, 0.72 mmol, 554  $\mu\text{L}$ ) was added dropwise via syringe. The reaction mixture was stirred for 30 min. at  $-78$  °C. The resultant enolate solution was transferred via canula to a THF solution of allyl bromide (323 mg, 1.92 mmol, 213  $\mu\text{L}$ ) and TEA (195 mg, 1.92 mmol, 270  $\mu\text{L}$ ) at  $-78$  °C under nitrogen. The reaction was then stirred for 7 h, before being quenched with saturated aqueous  $\text{NH}_4\text{Cl}$  and diluted with diethyl ether. The phases were separated and the organic phase was washed with water and brine. The combined organics were dried over  $\text{MgSO}_4$  and concentrated. The resulting residue was subjected to silica gel chromatography (0 to 2% EtOAc in hexane gradient) to afford 69 mg (55%) of (2-phenethyl-1-(trimethylsilyl)pent-4-en-1-one) (5) as a clear oil. IR (neat) 2953, 1715, 1640, 1454, 1250  $\text{cm}^{-1}$ ;  $^1\text{H}$  NMR (500 MHz,  $\text{CDCl}_3$ )  $\delta$  7.28–7.10 (m, 5H), 5.70–5.61 (m, 1H), 5.02–4.96 (m, 2H), 3.02–2.97 (m, 1H), 2.5–2.45 (m, 2H), 2.40–2.32 (m, 1H), 2.11–2.04 (m, 1H), 1.97–1.89 (m, 1H), 1.63–1.54 (m, 1H), 0.16 (s, 9H);  $^{13}\text{C}$  NMR (125 MHz,  $\text{CDCl}_3$ )  $\delta$  250.5, 141.8,

135.8, 128.4, 128.3, 125.9, 116.6, 77.2, 54.6, 33.5, 30.6, -2.8; HRMS (EI)  $m/z$  259.1528 [(M - H)<sup>+</sup>; calcd for C<sub>16</sub>H<sub>23</sub>OSi, 259.1518].

**Preparation of 2-benzyl-4-phenyl-1-(trimethylsilyl)butan-1-one (6) (Table 2, Entry 2):**

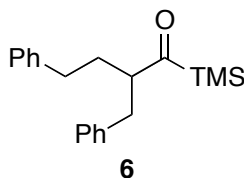

A solution of  $\alpha$ -benzyloxyallylsilane (**1**) (99 mg, 0.45 mmol) in THF (0.065 M) was cooled to -78 °C under nitrogen. *s*-BuLi (1.3 M in cyclohexane, 1.5 equiv, 0.67 mmol, 513  $\mu$ L) was added dropwise via syringe. The reaction mixture was stirred for 30 min. at -78 °C. The resultant enolate solution was transferred via canula to a THF solution of methyl iodide (307 mg, 1.80 mmol, 213  $\mu$ L) and TEA (182 mg, 1.80 mmol, 250  $\mu$ L) at -78 °C under nitrogen. The reaction was then stirred for 1.5 h, before being quenched with saturated aqueous NH<sub>4</sub>Cl and diluted with diethyl ether. The phases were separated and the organic phase was washed with water and brine. The combined organics were dried over MgSO<sub>4</sub> and concentrated. The resulting residue was subjected to silica gel chromatography (0 to 2% EtOAc in hexane gradient) to afford 92 mg (66%) of 2-benzyl-4-phenyl-1-(trimethylsilyl)butan-1-one (**6**) as a light yellow oil. IR (neat) 3026, 2951, 1713, 1639, 1603, 1496, 1454, 1250 cm<sup>-1</sup>; <sup>1</sup>H NMR (300 MHz, CDCl<sub>3</sub>)  $\delta$  7.32–7.13 (m, 10H), 3.43–3.33 (m, 1H), 3.12–2.94 (dd,  $J$  = 13.7, 7.8 Hz, 1H), 2.63–2.47 (m, 3H), 2.02–1.90 (m, 1H), 1.69–1.57 (m, 1H), 0.08 (s, 9H); <sup>13</sup>C (125 MHz, CDCl<sub>3</sub>)  $\delta$  251.8, 141.7, 139.9, 129.0, 128.4, 128.3, 126.1, 125.9, 56.3, 35.9, 33.4, 31.3, -3.2; HRMS (EI)  $m/z$  309.1669 [(M - H)<sup>+</sup>; calcd for C<sub>20</sub>H<sub>25</sub>OSi, 309.1675].

**Preparation of 2-methyl-4-phenyl-1-(trimethylsilyl)butan-1-one (7) (Table 2, Entry 3):**

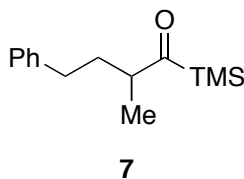

A solution of  $\alpha$ -benzyloxyallylsilane (**1**) (98 mg, 0.445 mmol) in THF (0.065 M) was cooled to -78 °C under nitrogen. *s*-BuLi (1.3 M in cyclohexane, 1.5 equiv, 0.67 mmol, 513  $\mu$ L) was added dropwise via syringe. The reaction mixture was stirred for 30 min. at -78 °C. The resultant enolate solution was transferred via canula to a THF solution of methyl iodide (252 mg, 1.78

mmol, 110  $\mu\text{L}$ ) and TEA (180 mg, 1.78 mmol, 248  $\mu\text{L}$ ) at  $-78\text{ }^\circ\text{C}$  under nitrogen. The reaction was then stirred for 50 min, before being quenched with saturated aqueous  $\text{NH}_4\text{Cl}$  and diluted with diethyl ether. The phases were separated and the organic phase was washed with water and brine. The combined organics were dried over  $\text{MgSO}_4$  and concentrated. The resulting residue was subjected to silica gel chromatography (0 to 2% EtOAc in hexane gradient) to afford 92 mg (73%) of 2-methyl-4-phenyl-1-(trimethylsilyl)butan-1-one (**7**) as a light yellow oil. IR (neat) 2963, 1713, 1639, 1604, 1454, 1250  $\text{cm}^{-1}$ ;  $^1\text{H}$  NMR (500 MHz,  $\text{CDCl}_3$ )  $\delta$  7.27–7.13 (m, 5H), 2.94–2.87 (m, 1H), 2.60–2.47 (m, 2H), 2.03–1.96 (m, 1H), 1.51–1.144 (m, 1H), 1.00 (d,  $J = 6.8$  Hz, 3H), 0.16 (s, 9H);  $^{13}\text{C}$  NMR (125 MHz,  $\text{CDCl}_3$ )  $\delta$  250.4, 141.9, 128.3, 125.8, 49.6, 33.4, 32.6, 14.3,  $-2.7$ ; HRMS (EI)  $m/z$  233.1356 [(M – H) $^+$ ; calcd for  $\text{C}_{14}\text{H}_{21}\text{OSi}$ , 233.1362].

**Preparation of 2-ethyl-4-phenyl-1-(trimethylsilyl)butan-1-one (8) and (*E*)-(1-ethoxy)-4-phenylbut-1-enyl)trimethylsilane (9) (Table 2, Entry 4):**

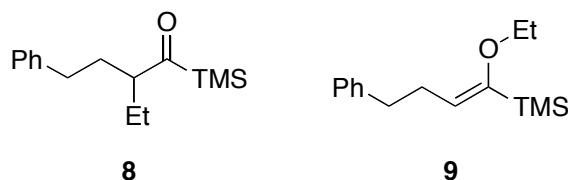

A solution of  $\alpha$ -benzyloxyallylsilane (**1**) (121 mg, 0.55 mmol) in THF (0.065 M) was cooled to  $-78\text{ }^\circ\text{C}$  under nitrogen.  $s\text{-BuLi}$  (1.3 M in cyclohexane, 1.5 equiv, 0.82 mmol, 634  $\mu\text{L}$ ) was added dropwise via syringe. The reaction mixture was stirred for 30 min. at  $-78\text{ }^\circ\text{C}$ . The resultant enolate solution was transferred via canula to a THF solution of ethyl iodide (343 mg, 2.20 mmol, 176  $\mu\text{L}$ ) and HMPA (394 mg, 2.20 mmol, 250  $\mu\text{L}$ ) of HMPA at  $-78\text{ }^\circ\text{C}$  under nitrogen. The reaction was then stirred for 17 h, before being quenched with saturated aqueous  $\text{NH}_4\text{Cl}$  and diluted with diethyl ether. The phases were separated and the organic phase was washed with water and brine. The combined organics were dried over  $\text{MgSO}_4$  and concentrated. The resulting residue was subjected to silica gel chromatography (0 to 2% EtOAc in hexane gradient) to afford 112 mg (82%) of a 3:1 mixture of 2-ethyl-4-phenyl-1-(trimethylsilyl)butan-1-one (**8**) and (*E*)-(1-ethoxy)-4-phenylbut-1-enyl)trimethylsilane (**9**) as (ratio by  $^1\text{H}$ NMR) as a light yellow oil. For **8**: IR (neat) 2961, 1713, 1639, 1454, 1250  $\text{cm}^{-1}$ ;  $^1\text{H}$  NMR (500 MHz,  $\text{CDCl}_3$ )  $\delta$  7.30–7.16 (m, 5H), 2.85–2.78 (m, 1H), 2.52–2.42 (m, 2H), 1.97–1.89 (m, 1H), 1.71–1.62 (m, 1H), 1.59–1.51 (m, 1H), 1.43–1.34 (m, 1H), 0.85 (*apparent t*,  $J = 7.8, 6.8$  Hz, 3H), 0.21 (s, 9H);  $^{13}\text{C}$  NMR (125 MHz,  $\text{CDCl}_3$ )  $\delta$  251.2, 142.0, 128.4, 128.3, 125.8, 57.1, 33.7, 30.6, 22.3, 11.7,  $-2.7$ ; HRMS ( $\text{NH}_3$  Cl)  $m/z$  249.1676 [(M+H) $^+$ ; calcd for  $\text{C}_{15}\text{H}_{25}\text{OSi}$ , 249.1675]. For **9**:  $^1\text{H}$  NMR (500 MHz,  $\text{CDCl}_3$ )  $\delta$  7.33–7.16 (m, 5H), 5.10 (*apparent t*,  $J = 7.3, 6.8$  Hz, 1H), 3.67–3.62 (q,  $J = 7.3, 6.8$  Hz, 2H),

2.39–2.25 (m, 2H), 1.86–1.78 (m, 2H), 1.20–1.17 (*apparent t*,  $J = 7.3, 6.8$  Hz, 3H), 0.12 (s, 9H);  $^{13}\text{C}$  NMR (300 MHz,  $\text{CDCl}_3$ )  $\delta$  161.2, 142.2, 128.4, 128.2, 128.1, 125.6, 66.2, 35.9, 27.2, 15.8, –0.66.

**Preparation of 2-phenethyl-1-(trimethylsilyl)pentan-1-one (10) and (*E*)-trimethyl(4-phenyl-1-propoxybut-1-enyl)silane (11) (Table 2, Entry 5):**

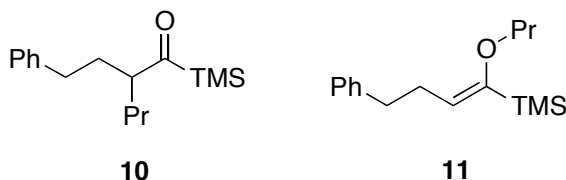

A solution of  $\alpha$ -benzyloxyallylsilane (**1**) (129 mg, 0.59 mmol) in THF (0.065 M) was cooled to  $-78$  °C under nitrogen. *s*-BuLi (1.3 M in cyclohexane, 1.5 equiv, 0.88 mmol, 680  $\mu\text{L}$ ) was added dropwise via syringe. The reaction mixture was stirred for 30 min. at  $-78$  °C. The resultant enolate solution was transferred via canula to a THF solution of propyl iodide (398 mg, 2.34 mmol, 228  $\mu\text{L}$ ) and HMPA (420 mg, 2.34 mmol, 410  $\mu\text{L}$ ) of HMPA at  $-78$  °C under nitrogen. The reaction was then stirred for 17 h, before being quenched with saturated aqueous  $\text{NH}_4\text{Cl}$  and diluted with diethyl ether. The phases were separated and the organic phase was washed with water and brine. The combined organics were dried over  $\text{MgSO}_4$  and concentrated. The resulting residue was subjected to silica gel chromatography (0 to 2% EtOAc in hexane gradient) to afford 102 mg (66%) of 2-phenethyl-1-(trimethylsilyl)pentan-1-one (**10**) and (*E*)-trimethyl(4-phenyl-1-propoxybut-1-enyl)silane (**11**) as 3:1 mixture (ratio by  $^1\text{H}$ NMR) as a light yellow oil. Resubjecting this material to a second silica gel column allowed for the isolation of pure **10** and a sample of **11** that was slightly contaminated by **10** and grease.

For **10**: IR (neat) 2957, 1717, 1638, 1454, 1250  $\text{cm}^{-1}$ ;  $^1\text{H}$  NMR (500 MHz,  $\text{CDCl}_3$ )  $\delta$  7.29–7.12 (m, 5H), 2.92–2.86 (m, 1H), 2.52–2.44 (m, 2H), 1.95–1.88 (m, 1H), 1.65–1.51 (m, 2H), 1.32–1.17 (m, 3H), 0.86 (t,  $J = 6.8$  Hz, 3H), 0.16 (s, 9H);  $^{13}\text{C}$  NMR (125 MHz,  $\text{CDCl}_3$ )  $\delta$  251.2, 142.0, 128.34, 128.32, 125.8, 55.3, 33.7, 31.5, 31.0, 20.6, 14.3, –2.7; HRMS ( $\text{NH}_3$  Cl)  $m/z$  263.1821 [(M + H) $^+$ ; calcd for  $\text{C}_{16}\text{H}_{27}\text{OSi}$ , 263.1831].

For **11**: IR (neat) 2959, 1605, 1454, 1248  $\text{cm}^{-1}$ ;  $^1\text{H}$  NMR (300 MHz,  $\text{CDCl}_3$ )  $\delta$  7.32–7.12 (m, 5H), 5.11–5.06 (*apparent t*,  $J = 6.8, 7.1$  Hz, 1H), 3.57–3.53 (t,  $J = 6.6$  Hz, 2H), 2.66–2.61 (dd,  $J = 8.5, 9.5$  Hz, 2H), 2.502.42 (m, 2H), 1.65–1.53 (m, 2H), 0.96–0.91 (*apparent t*,  $J = 7.3, 7.6$  Hz, 3H), 0.13 (s, 9H);  $^{13}\text{C}$  NMR (75 MHz,  $\text{CDCl}_3$ )  $\delta$  161.4, 142.3, 128.4, 128.1, 125.6, 125.5, 72.4, 35.9, 27.2, 23.6, 10.6, –0.5.

**Preparation of (*E*)-1-(4-(trimethylsilyl)-4-(trimethylsilyloxy)but-3-enyl)benzene (**12**) (Table 2, Entry 7):**

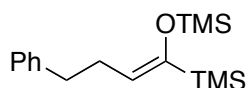

**12**

A solution of  $\alpha$ -benzyloxyallylsilane (**1**) (126 mg, 0.572 mmol) in THF (0.065 M) was cooled to  $-78$  °C under nitrogen. *s*-BuLi (1.3 M in cyclohexane, 1.5 equiv, 0.86 mmol, 660  $\mu$ L) was added dropwise via syringe. The reaction mixture was stirred for 30 min. at  $-78$  °C. The resultant enolate solution was transferred via canula to a THF solution of TMSCl (248 mg, 2.29 mmol, 290  $\mu$ L) and TEA (231 mg, 2.29 mmol, 320  $\mu$ L) at  $-78$  °C under nitrogen. The reaction was then stirred for 1.5 h, before being quenched with saturated aqueous  $\text{NH}_4\text{Cl}$  and diluted with diethyl ether. The phases were separated and the organic phase was washed with water and brine. The combined organics were dried over  $\text{MgSO}_4$  and concentrated. The resulting residue was subjected to silica gel chromatography (hexanes) to afford 142 mg (85%) of (*E*)-1-(4-(trimethylsilyl)-4-(trimethylsilyloxy)but-3-enyl)benzene (**12**) as clear oil. IR (neat) 3028, 2959, 1614, 1496, 1454, 1250, 1121  $\text{cm}^{-1}$ ;  $^1\text{H}$  NMR (300 MHz,  $\text{CDCl}_3$ )  $\delta$  7.29–7.16 (m, 5H), 5.07–5.02 (t,  $J = 6.7$  Hz, 1H), 2.66–2.60 (*apparent* t,  $J = 8.5, 7.4$  Hz, 2H), 2.40–2.35 (m, 2H), 0.16 (s, 9H), 0.07 (s, 9H);  $^{13}\text{C}$  NMR (125 MHz,  $\text{CDCl}_3$ )  $\delta$  157.1, 142.2, 128.4, 128.3, 125.7, 124.4, 35.7, 27.6, 0.9,  $-1.7$ ; HRMS ( $\text{NH}_3$  Cl)  $m/z$  293.1747 [(M + H) $^+$ ]; calcd for  $\text{C}_{16}\text{H}_{29}\text{OSi}_2$ , 293.1757].

**Preparation of (*E*)-4-phenyl-1-(trimethylsilyl)but-1-enyl acetate (**13**) (Table 2, Entry 8):**

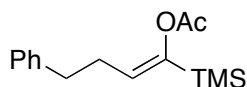

**13**

A solution of  $\alpha$ -benzyloxyallylsilane (**1**) (89 mg, 0.40 mmol) in THF (0.065 M) was cooled to  $-78$  °C under nitrogen. *s*-BuLi (1.3 M in cyclohexane, 1.5 equiv, 0.60 mmol, 460  $\mu$ L) was added dropwise via syringe. The reaction mixture was stirred for 30 min. at  $-78$  °C. The resultant enolate solution was transferred via canula to a THF solution of acetyl chloride (127 mg, 1.62 mmol, 115  $\mu$ L) at  $-78$  °C under nitrogen. The reaction was then stirred for 1.5 h, before being quenched with saturated aqueous  $\text{NH}_4\text{Cl}$  and diluted with diethyl ether. The phases were separated and the organic phase was washed with water and brine. The combined organics were dried over  $\text{MgSO}_4$  and concentrated. The resulting residue was subjected to silica gel

chromatography (0 to 2% EtOAc in hexane gradient) to afford 73 mg (69%) of (*E*)-4-phenyl-1-(trimethylsilyl)but-1-enyl acetate (**13**) as a clear oil. IR (neat) 3086, 3026, 2955, 2922, 2849, 1745, 1603, 1496, 1454, 1369, 1230, 1089, 1039  $\text{cm}^{-1}$ ;  $^1\text{H}$  NMR (500 MHz,  $\text{CDCl}_3$ )  $\delta$  7.30–7.15 (m, 5H), 5.51–5.48 (t,  $J = 7.0$  Hz, 1H), 2.68–2.64 (*apparent* t,  $J = 8.4, 7.5$  Hz, 2H), 2.36–2.31 (*apparent* quintet,  $J = 8.4, 7.5, 7.1$  Hz, 2H), 2.11 (s, 3H), 0.11 (s, 9H);  $^{13}\text{C}$  NMR (125 MHz,  $\text{CDCl}_3$ )  $\delta$  169.1, 155.3, 141.6, 130.5, 128.4, 128.3, 125.9, 35.0, 27.6, 20.5, –1.5; HRMS (EI)  $m/z$  262.1387 [ $\text{M}^+$ ]; calcd for  $\text{C}_{15}\text{H}_{22}\text{O}_2\text{Si}$ , 262.1389]. For a prior preparation of **13** see Motoki, Y.; Kazuyoshi, U.; Koichi, N. *Bull. Chem. Soc. Jpn.* **2005**, *78*, 477–486.

**Preparation of trimethyl(4-phenylbut-1-ynyl)silane (14) (Table 2, Entry 9):**

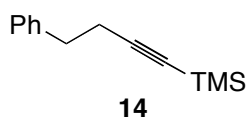

A solution of  $\alpha$ -benzyloxyallylsilane (**1**) (85 mg, 0.39 mmol) in THF (0.065 M) was cooled to  $-78$  °C under nitrogen. *s*-BuLi (1.3 M in cyclohexane, 1.5 equiv, 0.58 mmol, 450  $\mu\text{L}$ ) was added dropwise via syringe. The reaction mixture was stirred for 30 min. at  $-78$  °C. The resultant enolate solution was transferred via canula to a THF solution of perfluoro-1-butanefluorobutyl sulfonate (128 mg, 0.43 mmol, 76  $\mu\text{L}$ ) at  $-78$  °C under nitrogen. The reaction was then stirred for 5 h, before being quenched with saturated aqueous  $\text{NH}_4\text{Cl}$  and diluted with diethyl ether. The phases were separated and the organic phase was washed with water and brine. The combined organics were dried over  $\text{MgSO}_4$  and concentrated. The resulting residue was subjected to silica gel chromatography (0 to 2% EtOAc in hexane gradient) to afford 45 mg (58%) of trimethyl(4-phenylbut-1-ynyl)silane (**14**) as a clear oil. IR (neat) 2959, 2175, 1603, 1496, 1454, 1250  $\text{cm}^{-1}$ ;  $^1\text{H}$  NMR (300 MHz,  $\text{CDCl}_3$ )  $\delta$  7.32–7.20 (m, 5H), 2.85–2.80 (t,  $J = 7.7$  Hz, 2H), 2.51–2.46 (t,  $J = 7.7$  Hz, 2H), 0.13 (s, 9H);  $^{13}\text{C}$  NMR (75 MHz,  $\text{CDCl}_3$ )  $\delta$  140.6, 128.5, 128.3, 126.2, 106.6, 85.2, 35.1, 22.1, 0.1; HRMS (EI)  $m/z$  202.1174 [ $\text{M}^+$ ]; calcd for  $\text{C}_{13}\text{H}_{18}\text{Si}$ , 202.1178]. For a prior preparation of **14** see: (a) Jiang, H.; Zhu, S. *Tetrahedron Lett.* **2005**, *46*, 517–519. (b) Shimizu, K.; Takimoto, M.; Sato, Y.; Mori, M. *Org. Lett.* **2005**, *7*, 195–197. (c) Murakami, M.; Hayashi, M.; Ito, Y. *J. Org. Chem.* 1994, *59*, 7910–7914. (d) Miyachi, N.; Shibasaki, M. *J. Org. Chem.* **1990**, *55*, 1975–1976. (e) Negishi, E.; Matsushita, H.; Kobayashi, M.; Rand, C. *Tetrahedron Lett.* **1983**, *24*, 3823–3824.

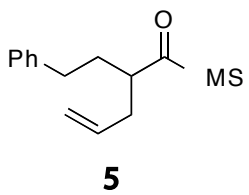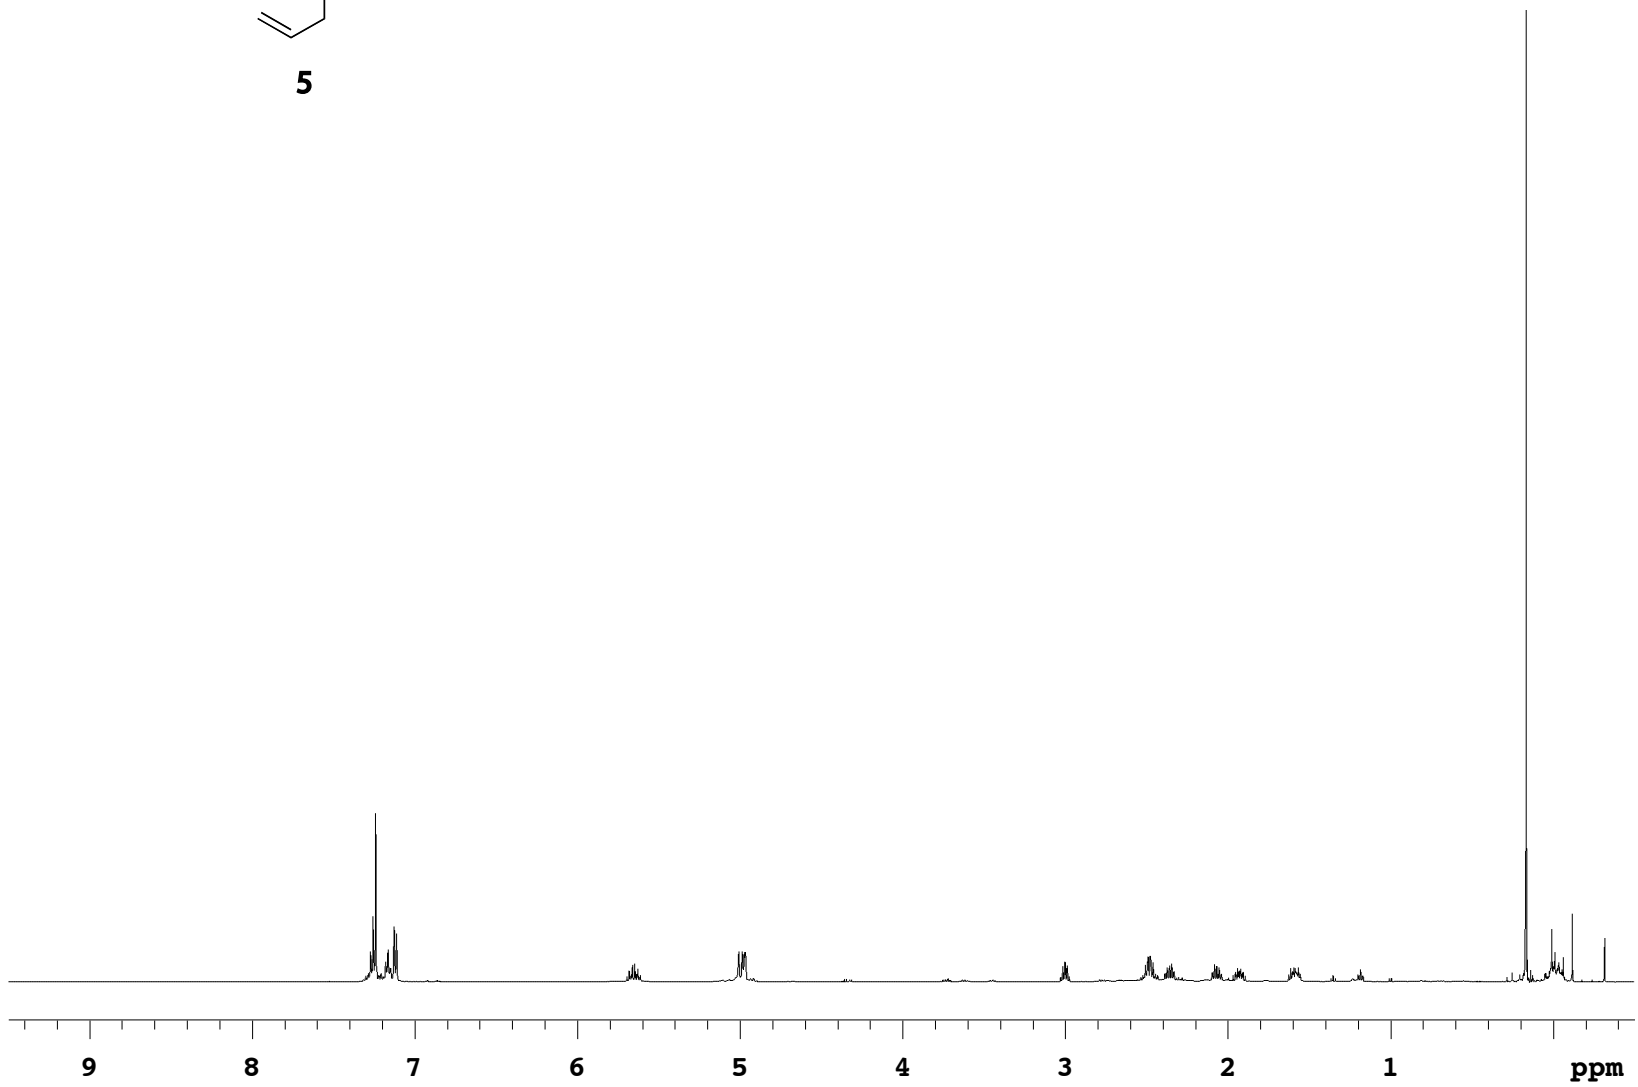



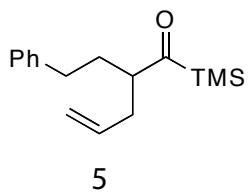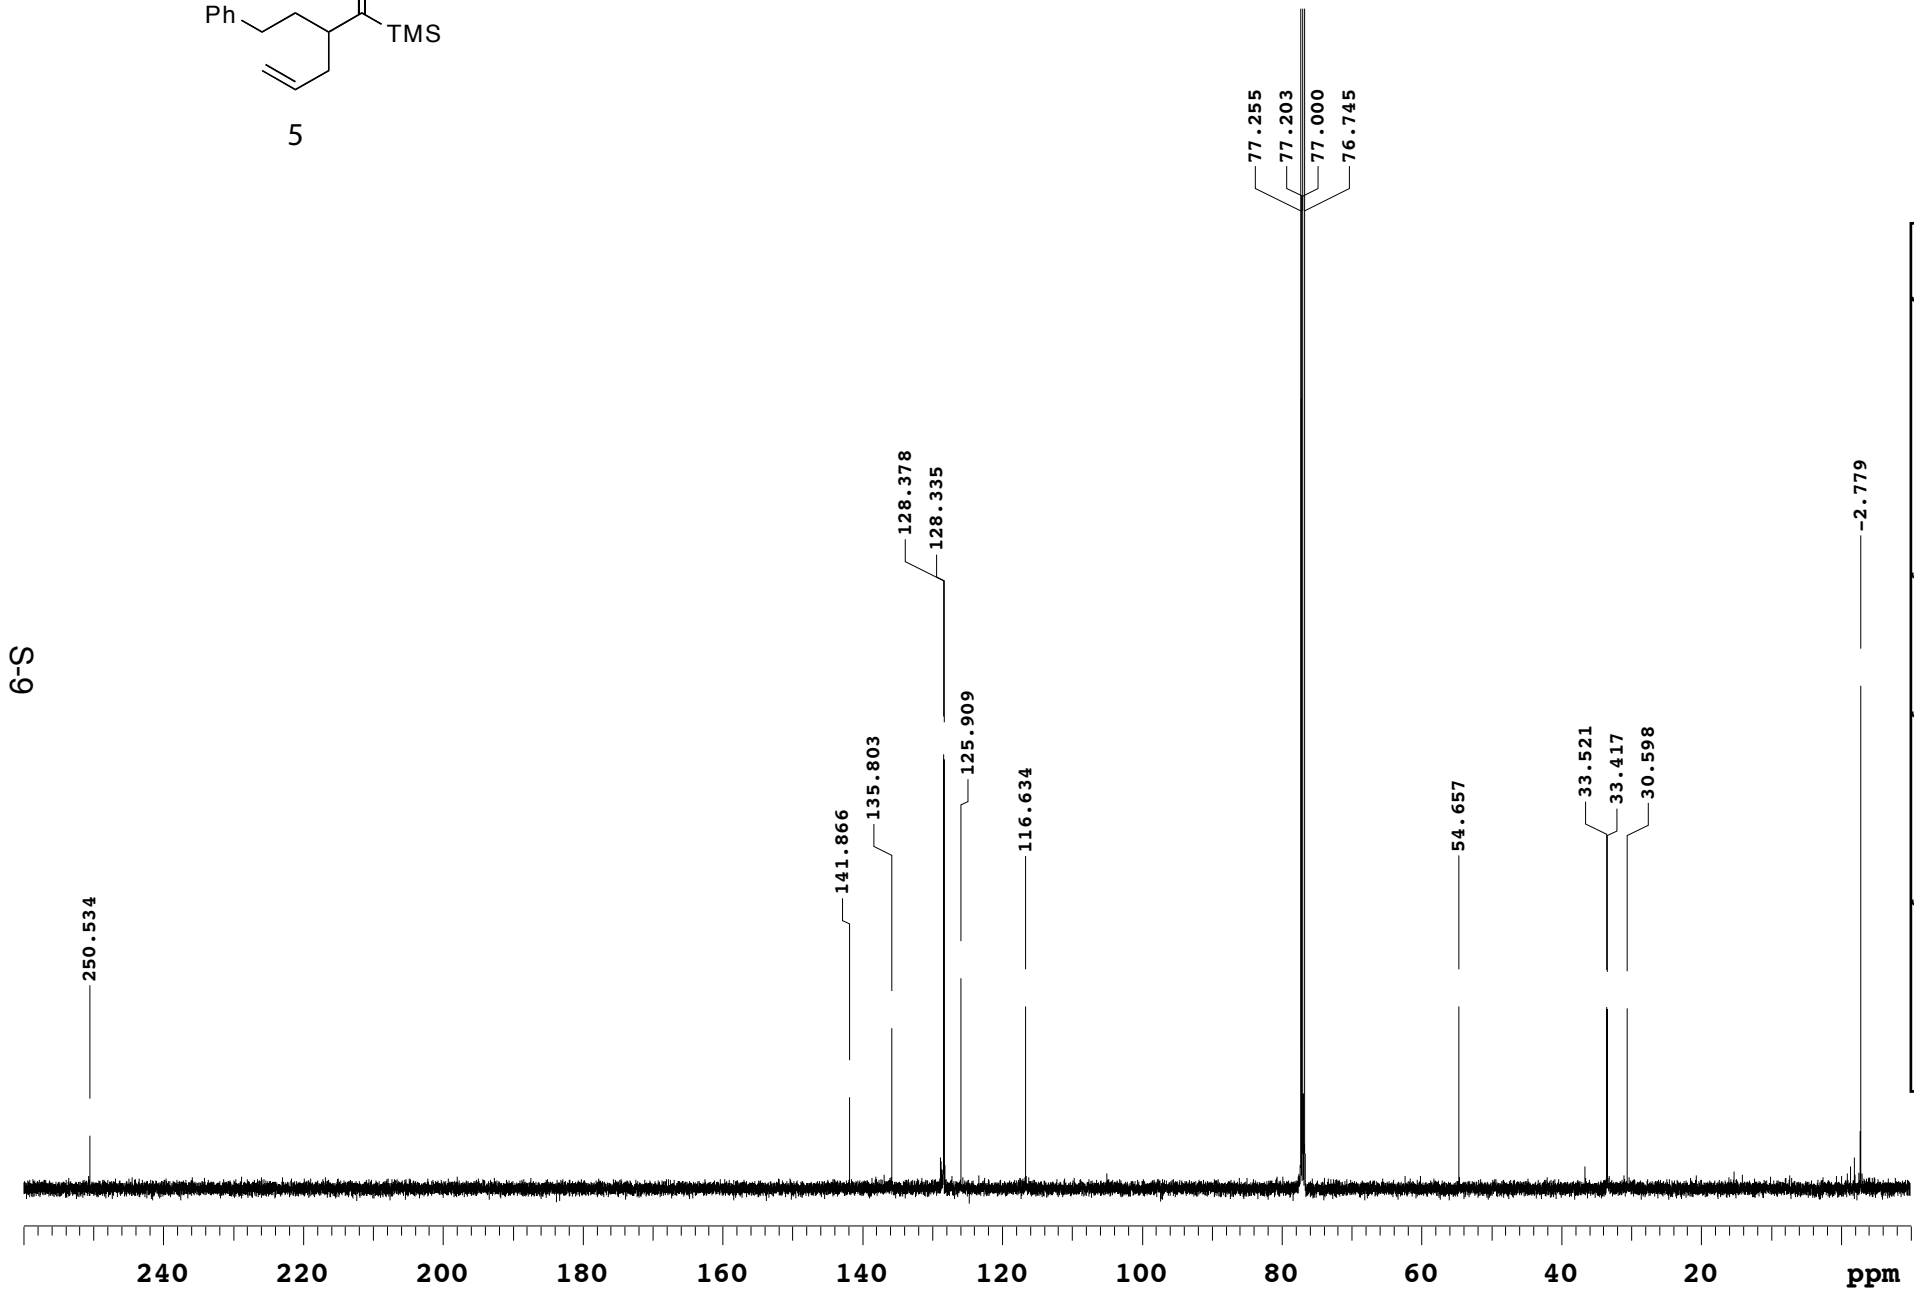

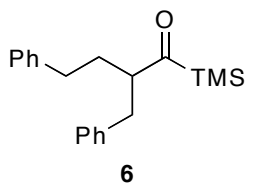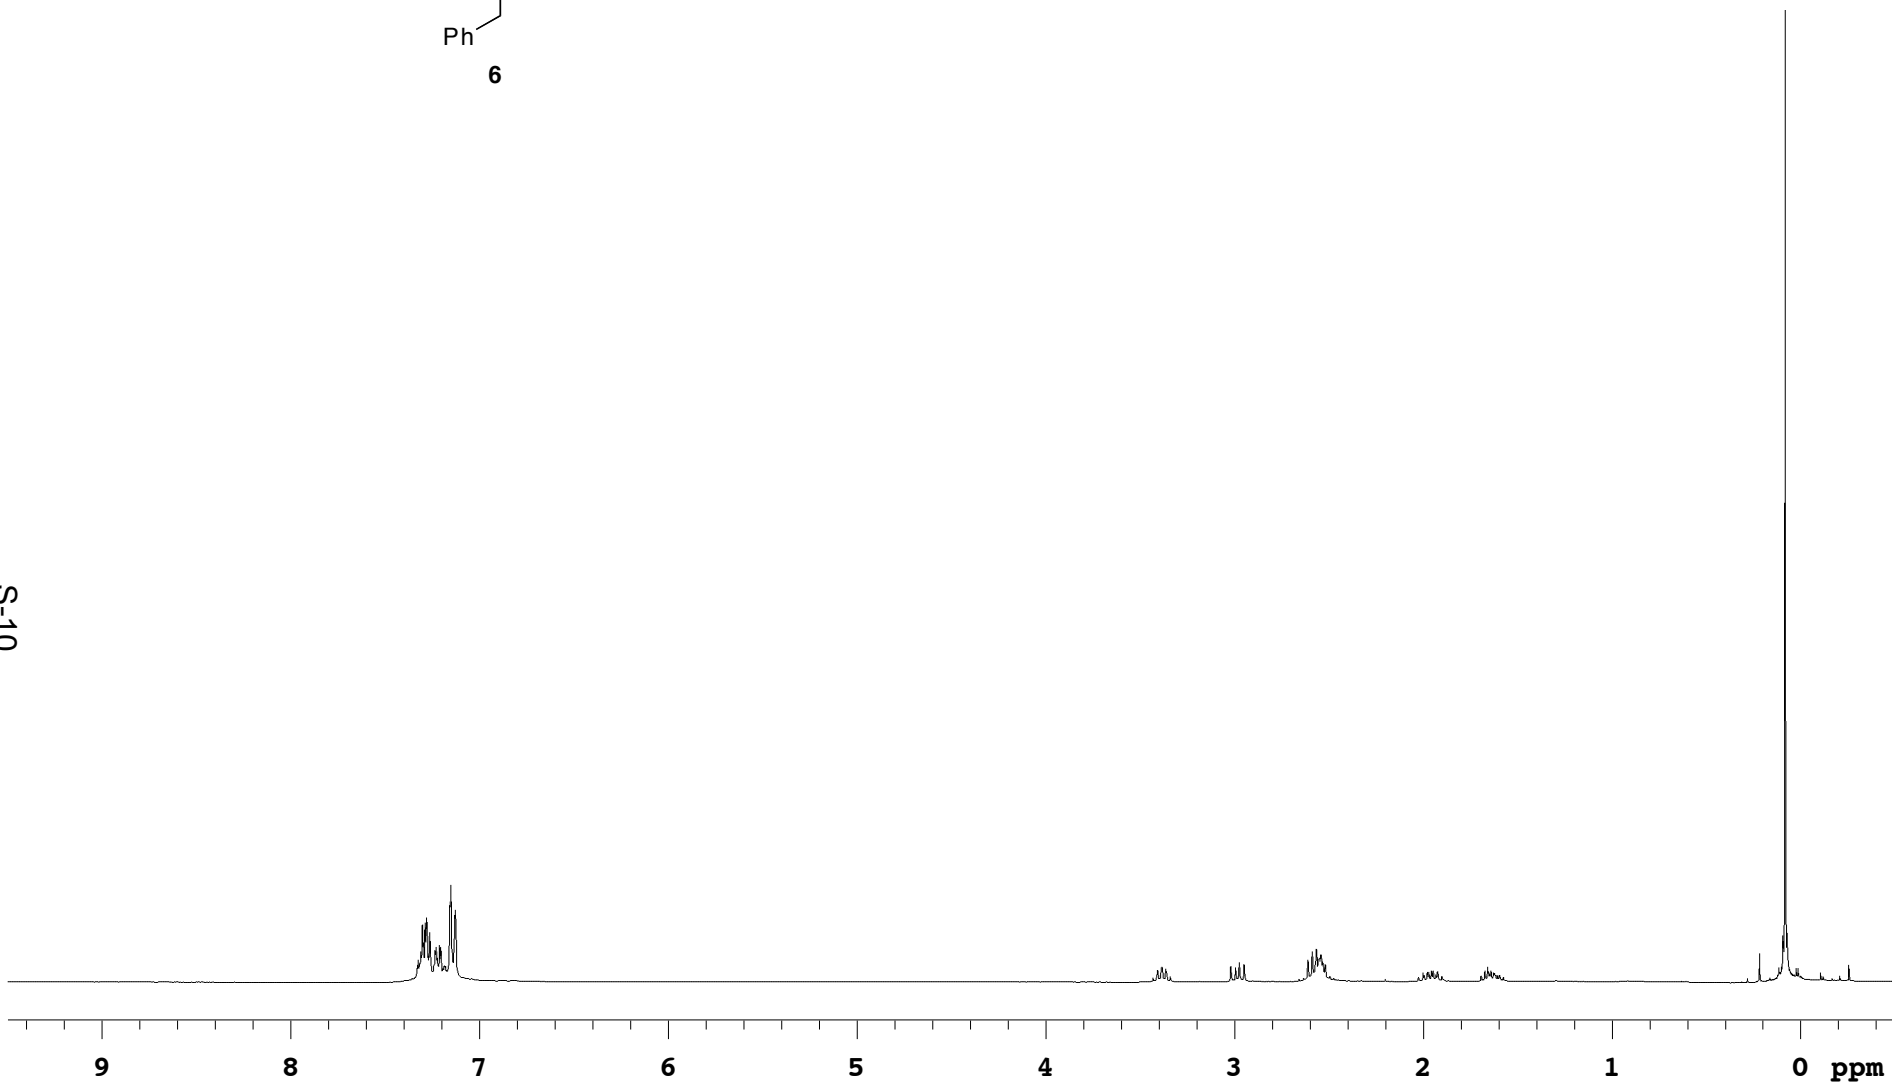

S-11

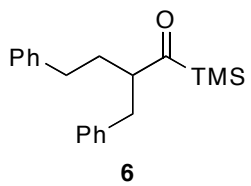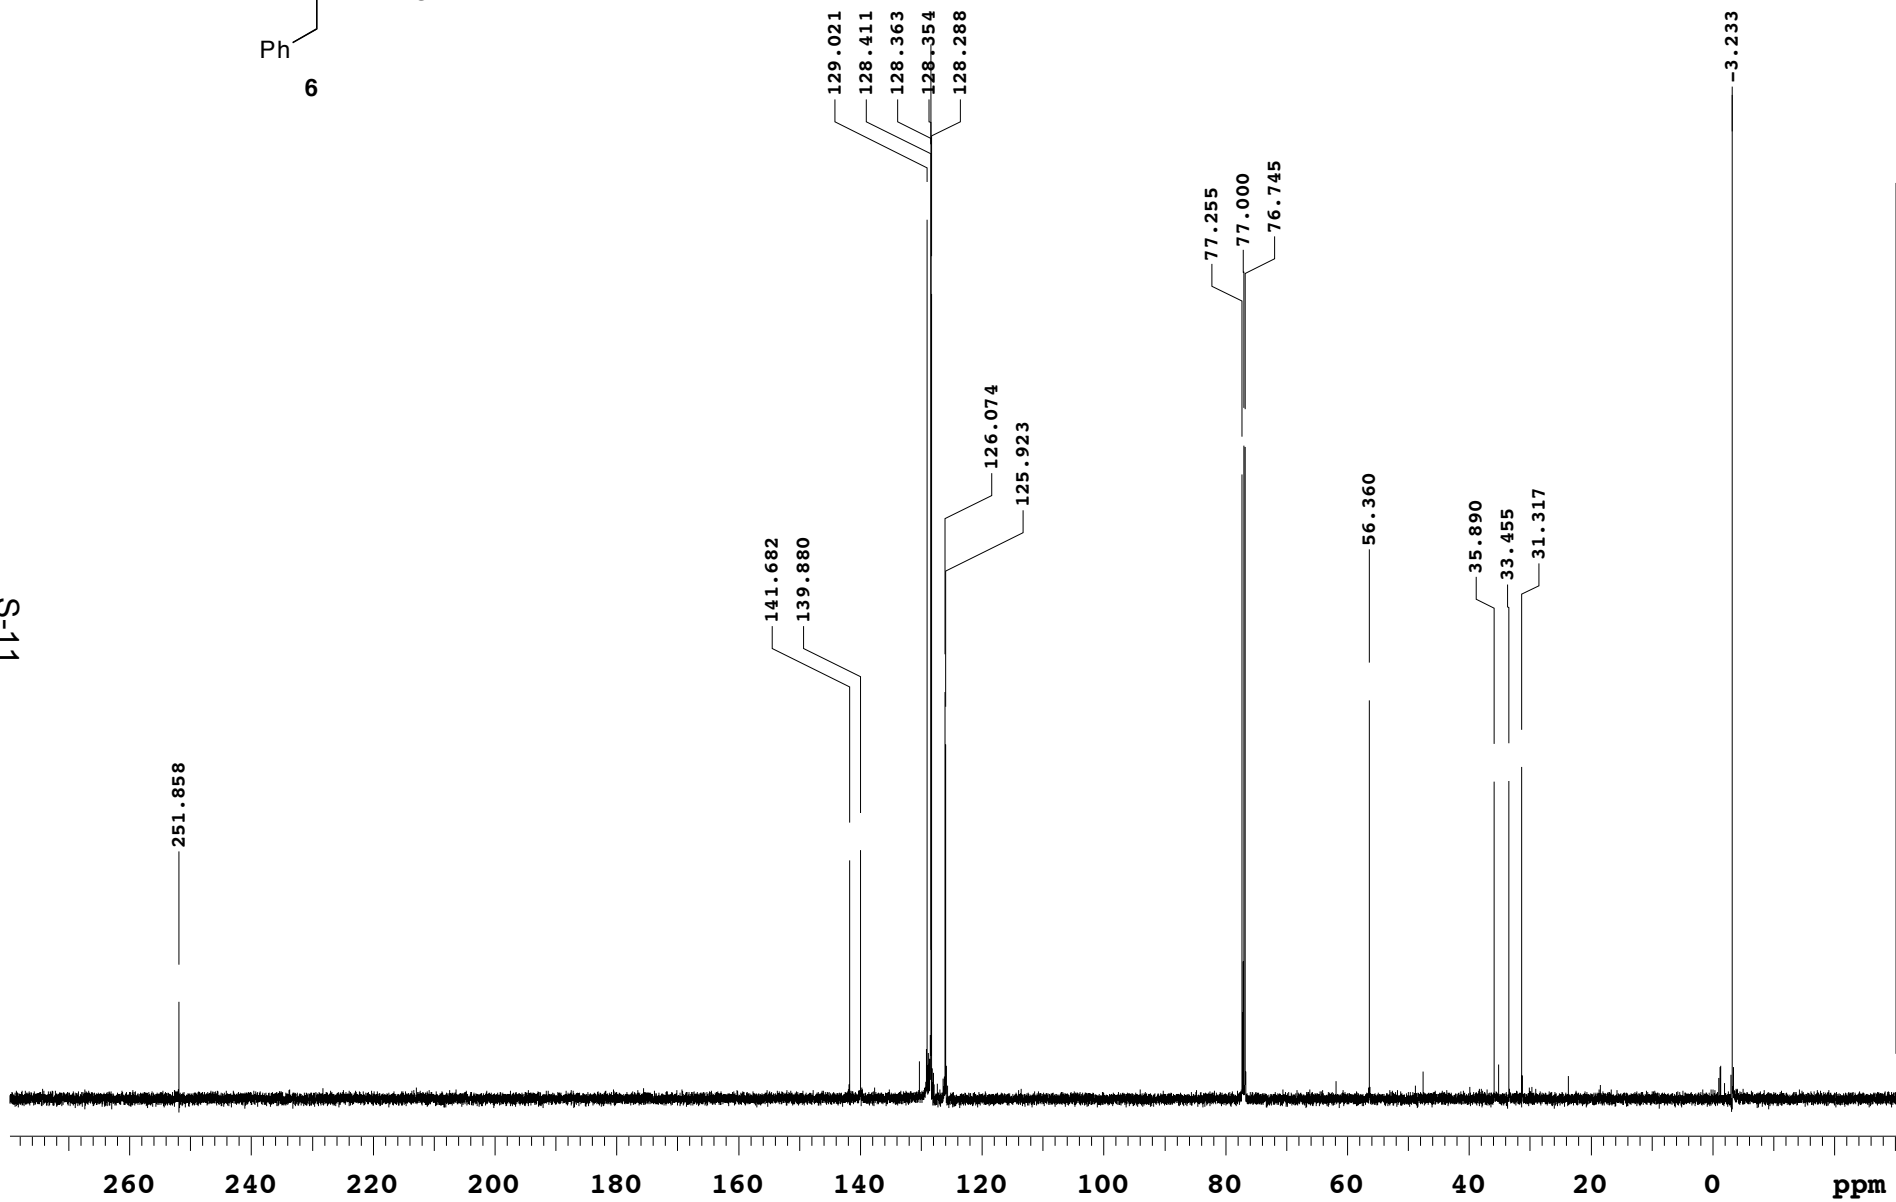

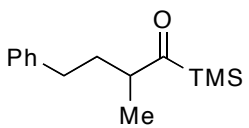

7

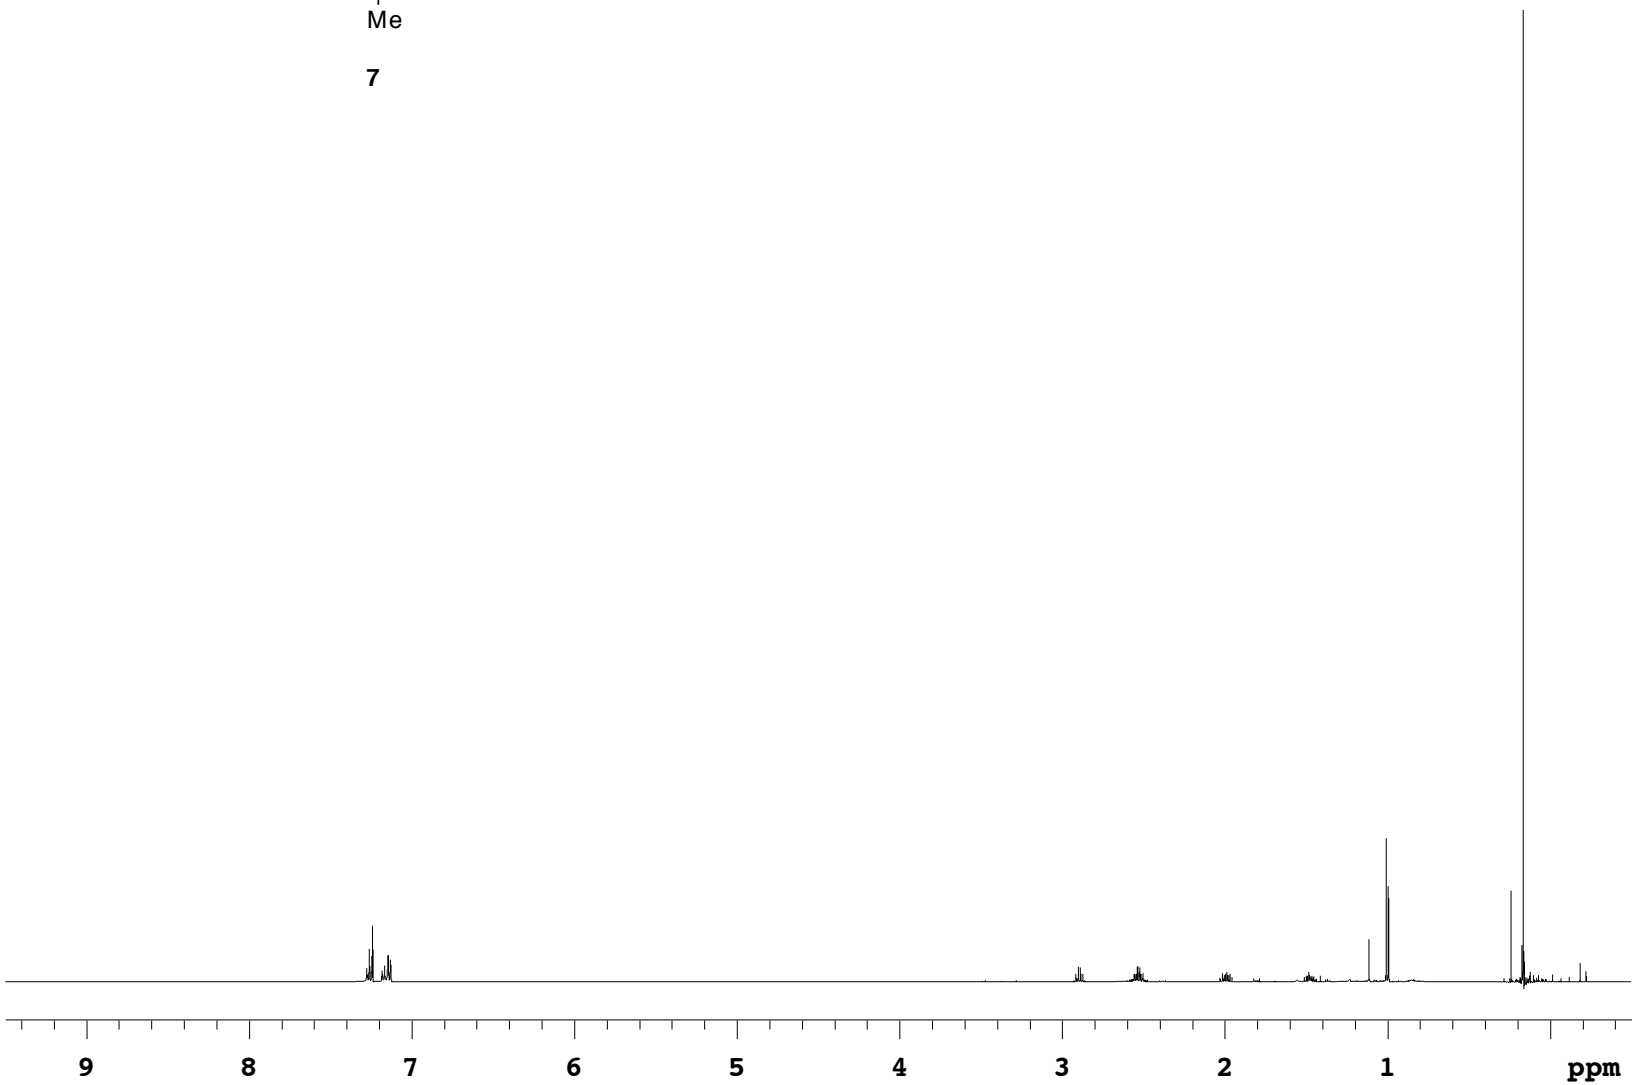

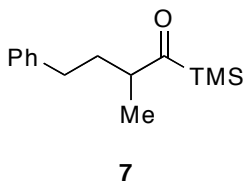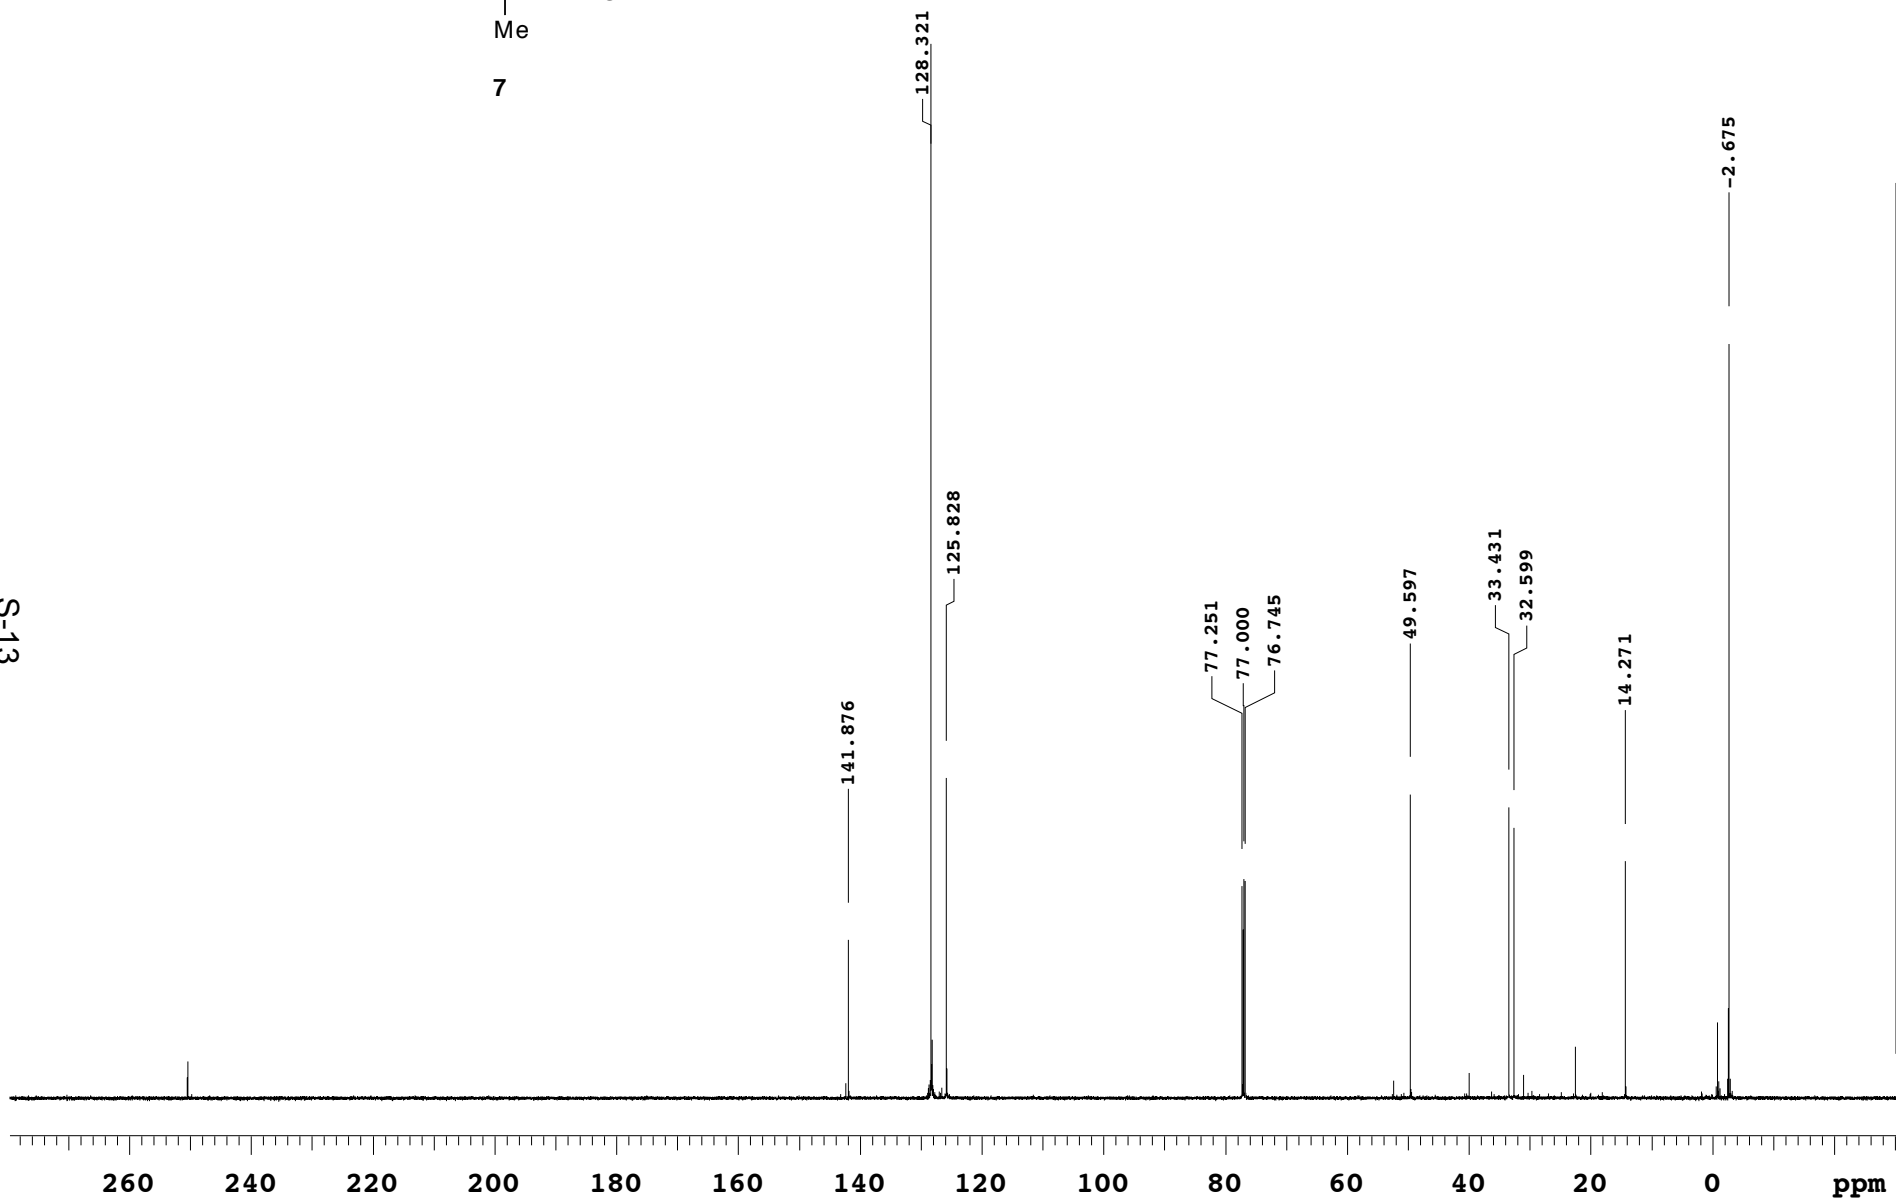

S-13

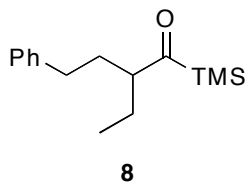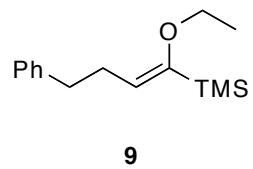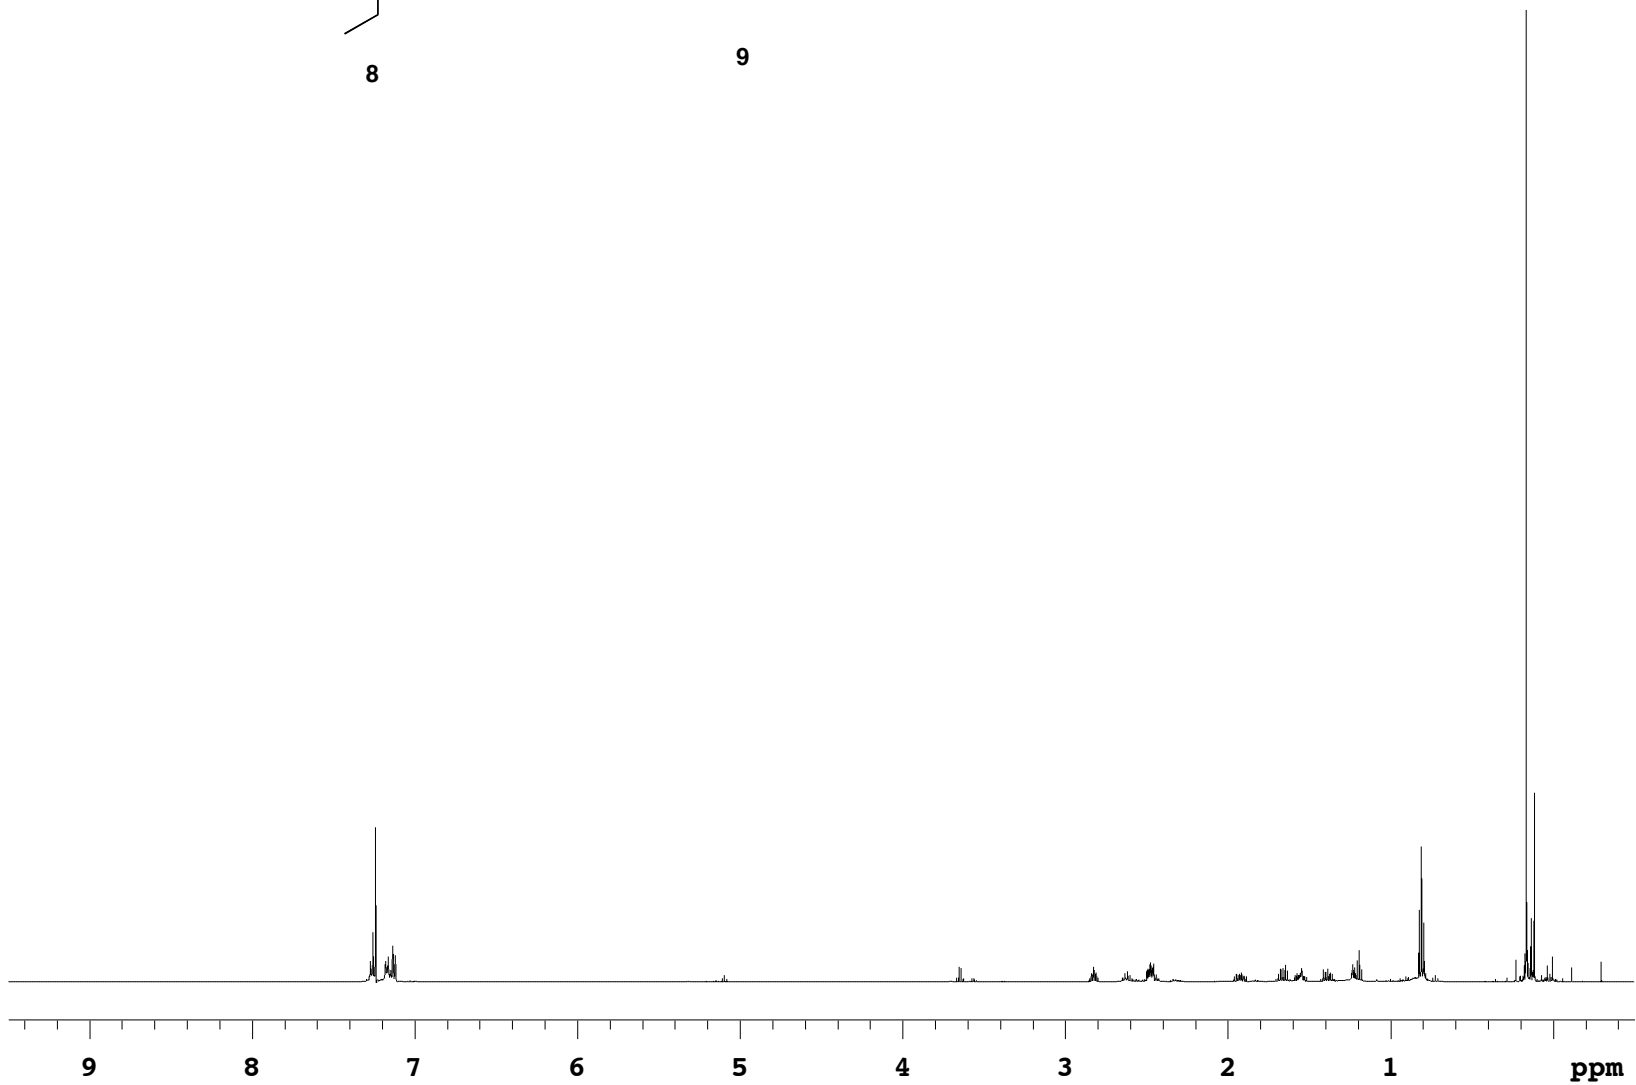

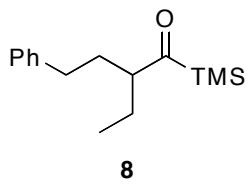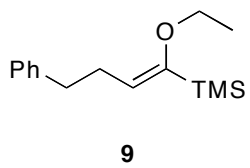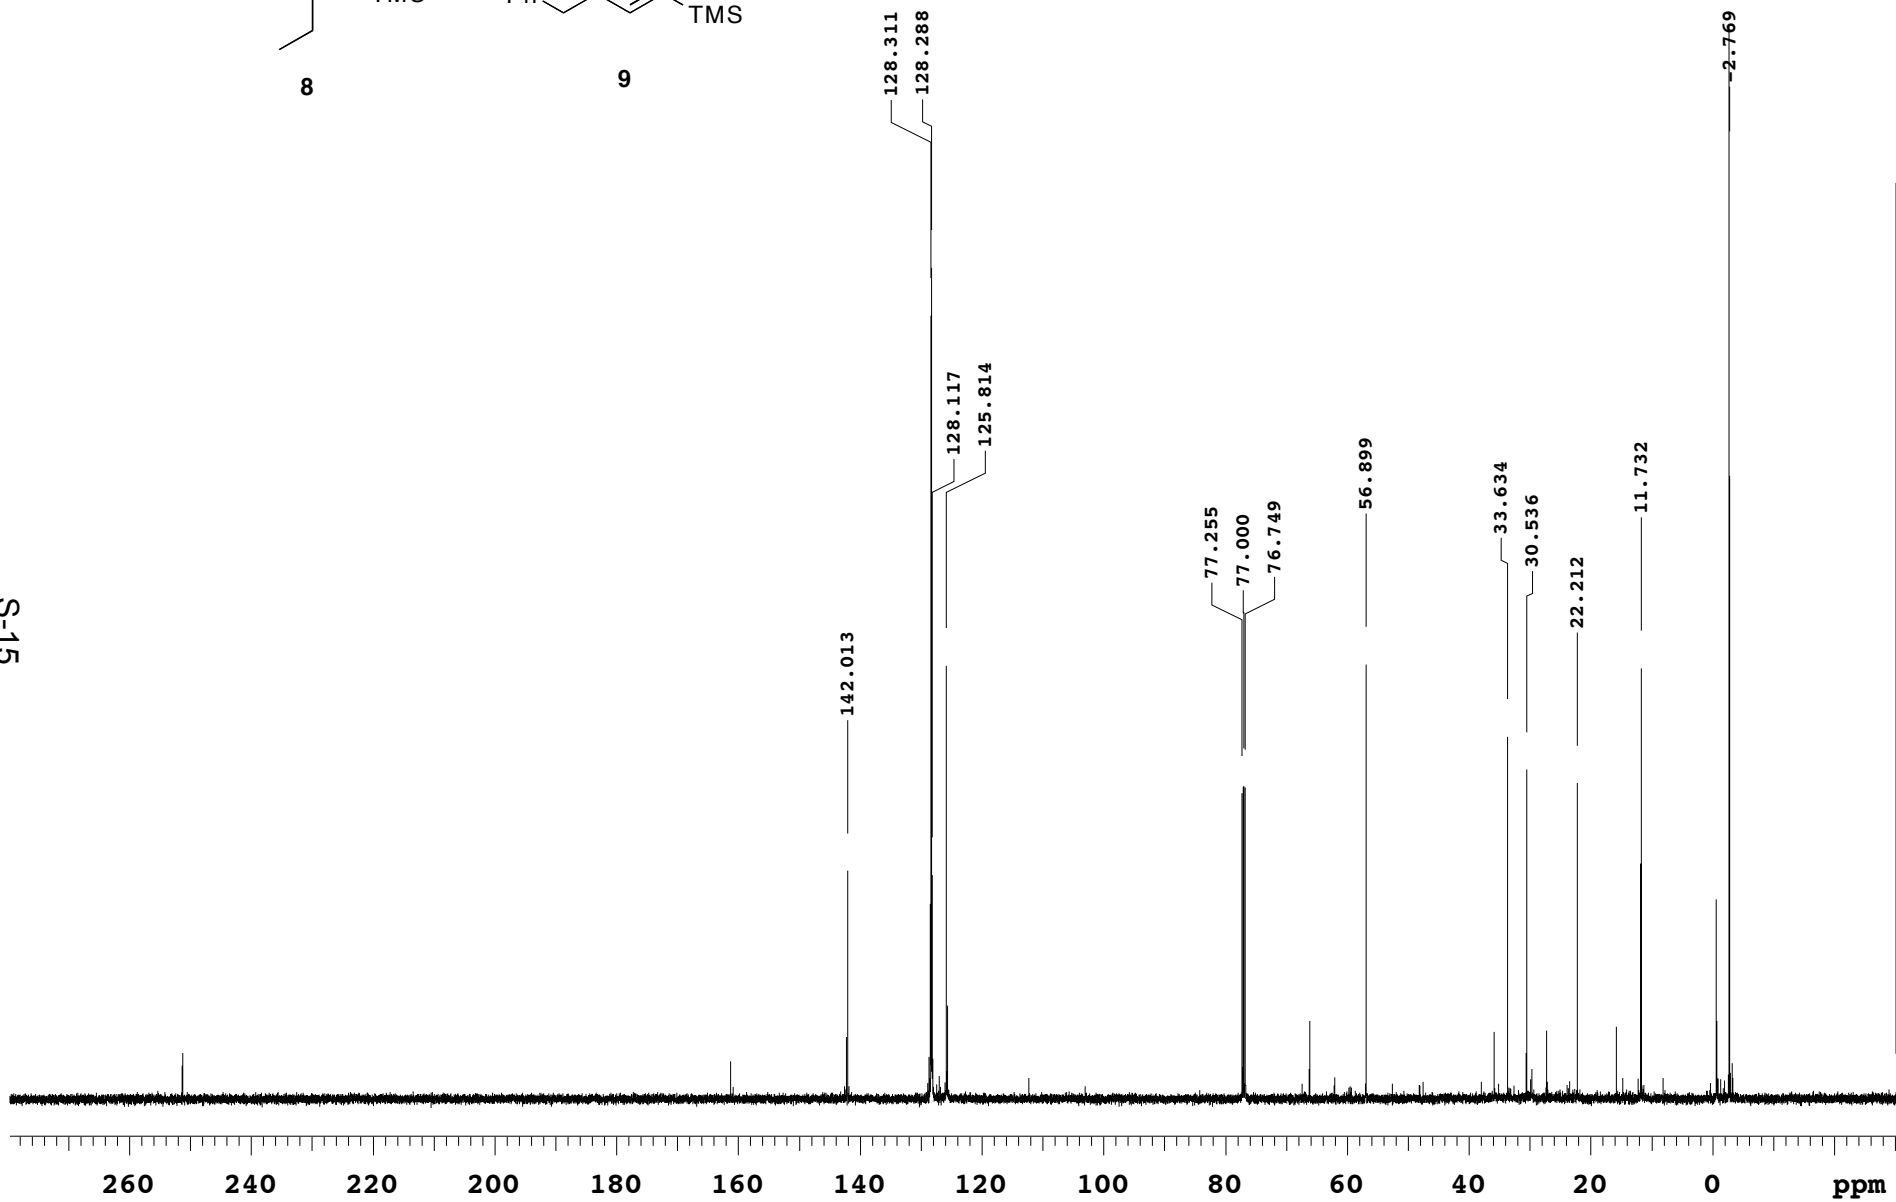

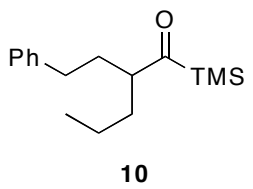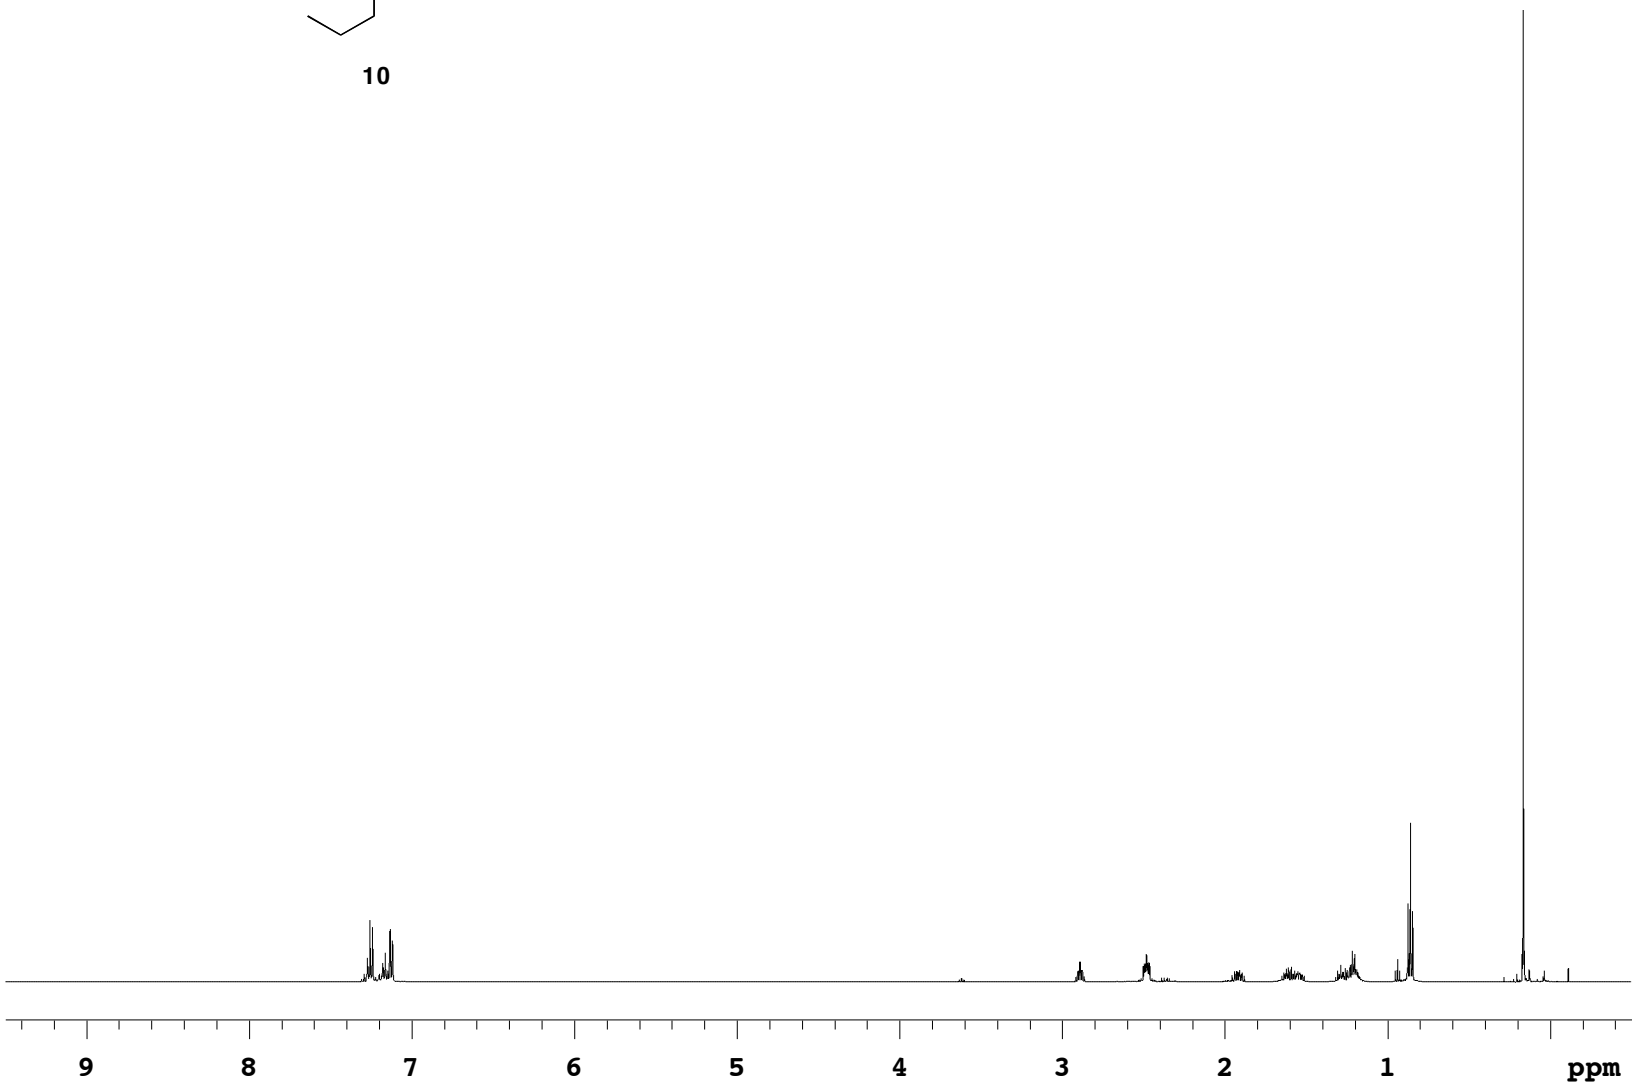



S-17

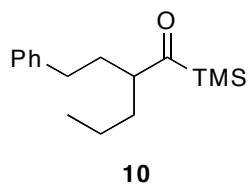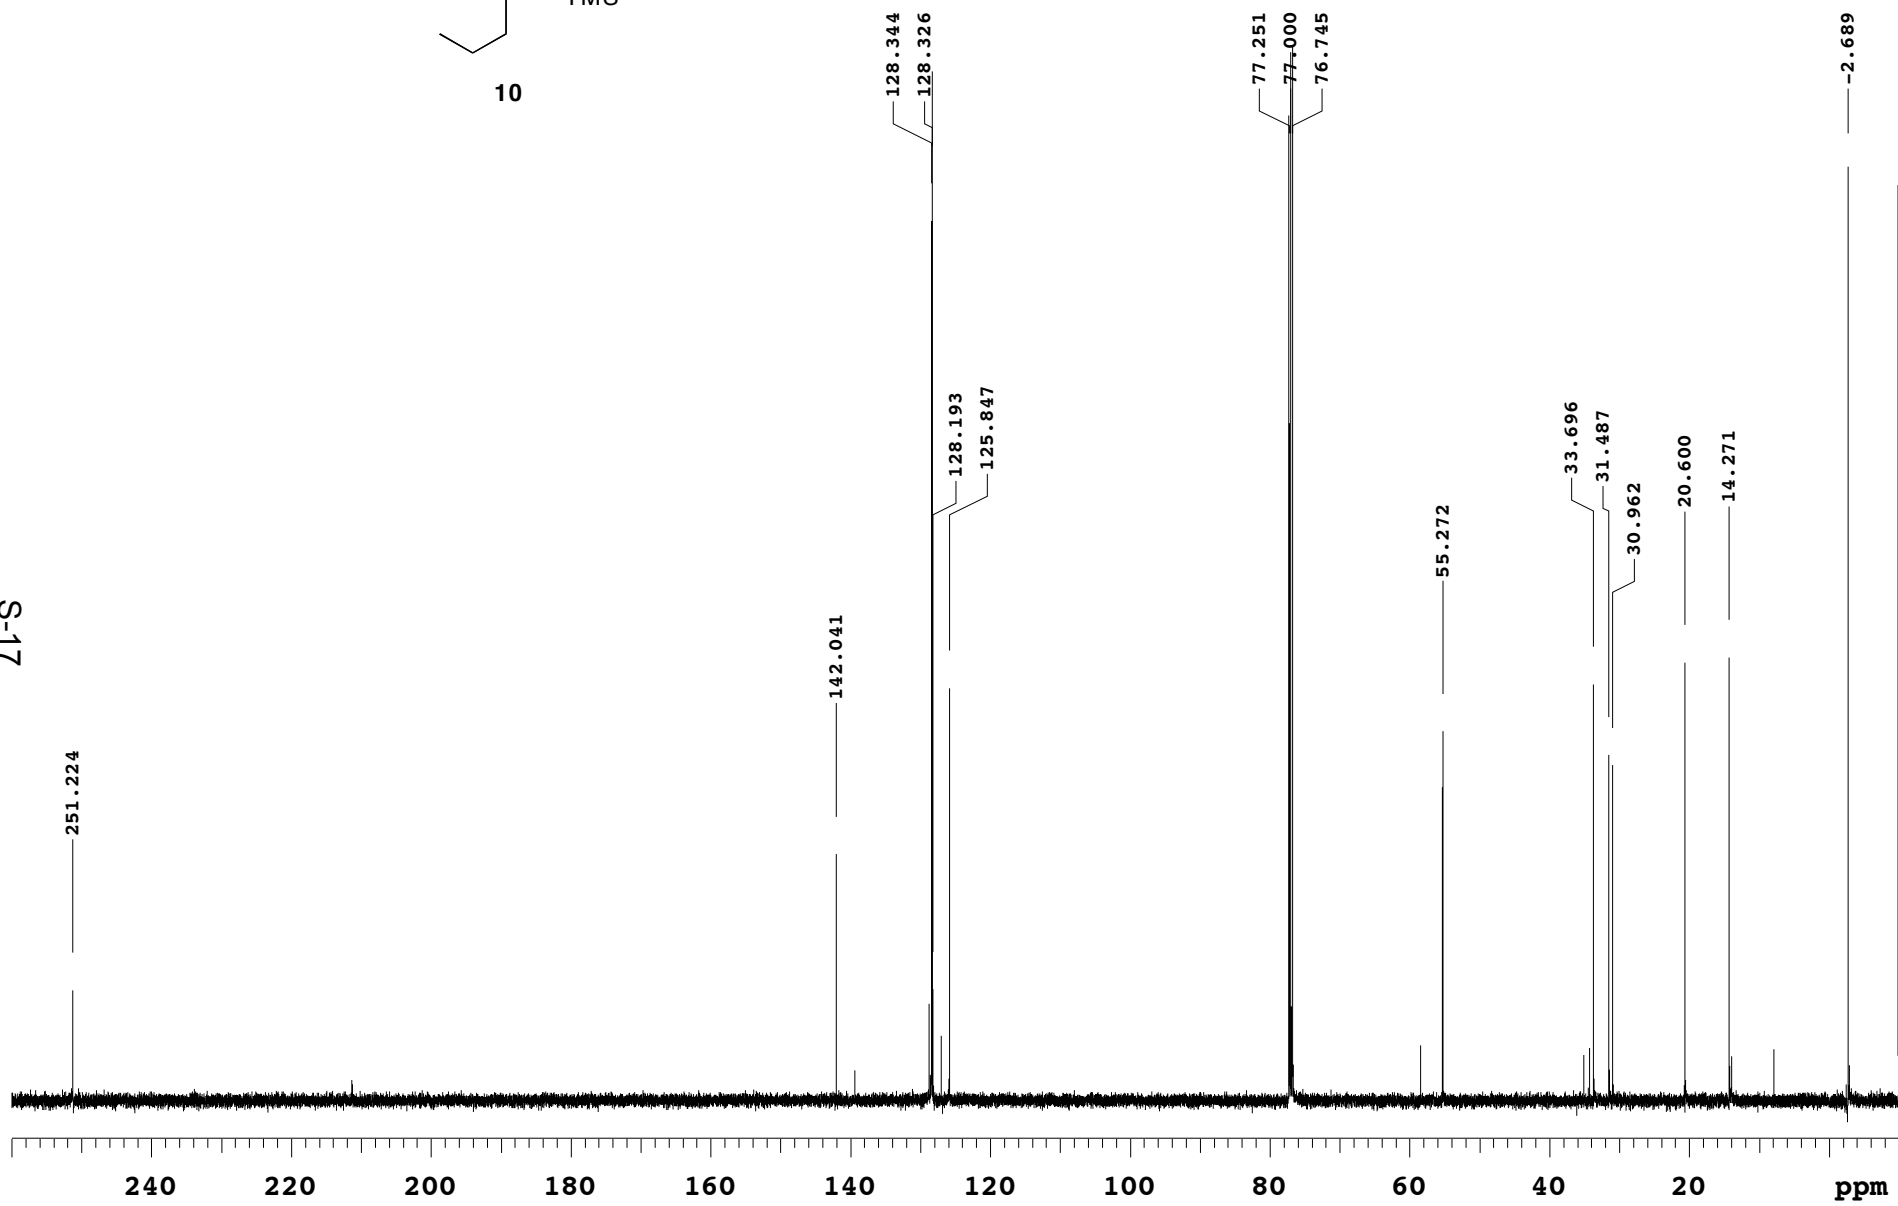

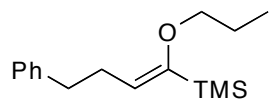

11

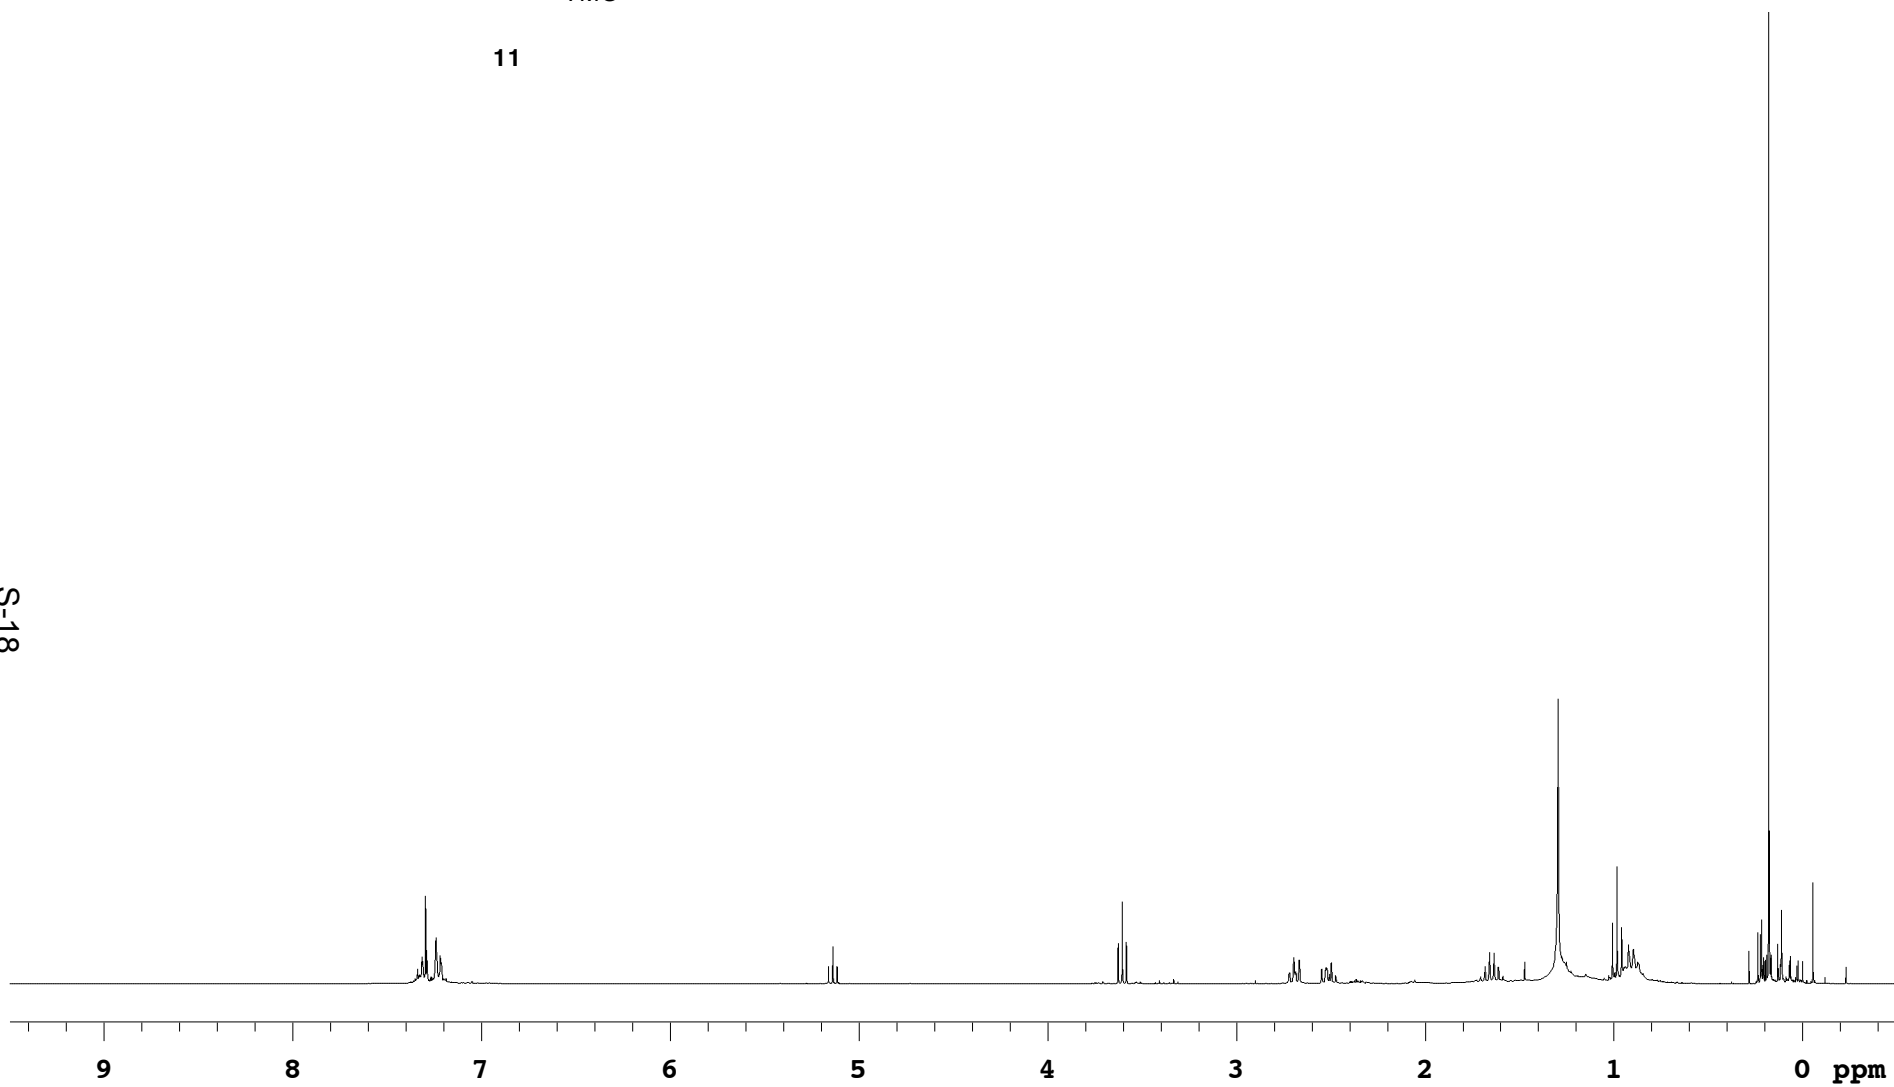

S-18

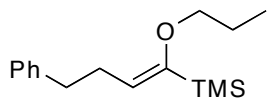

11

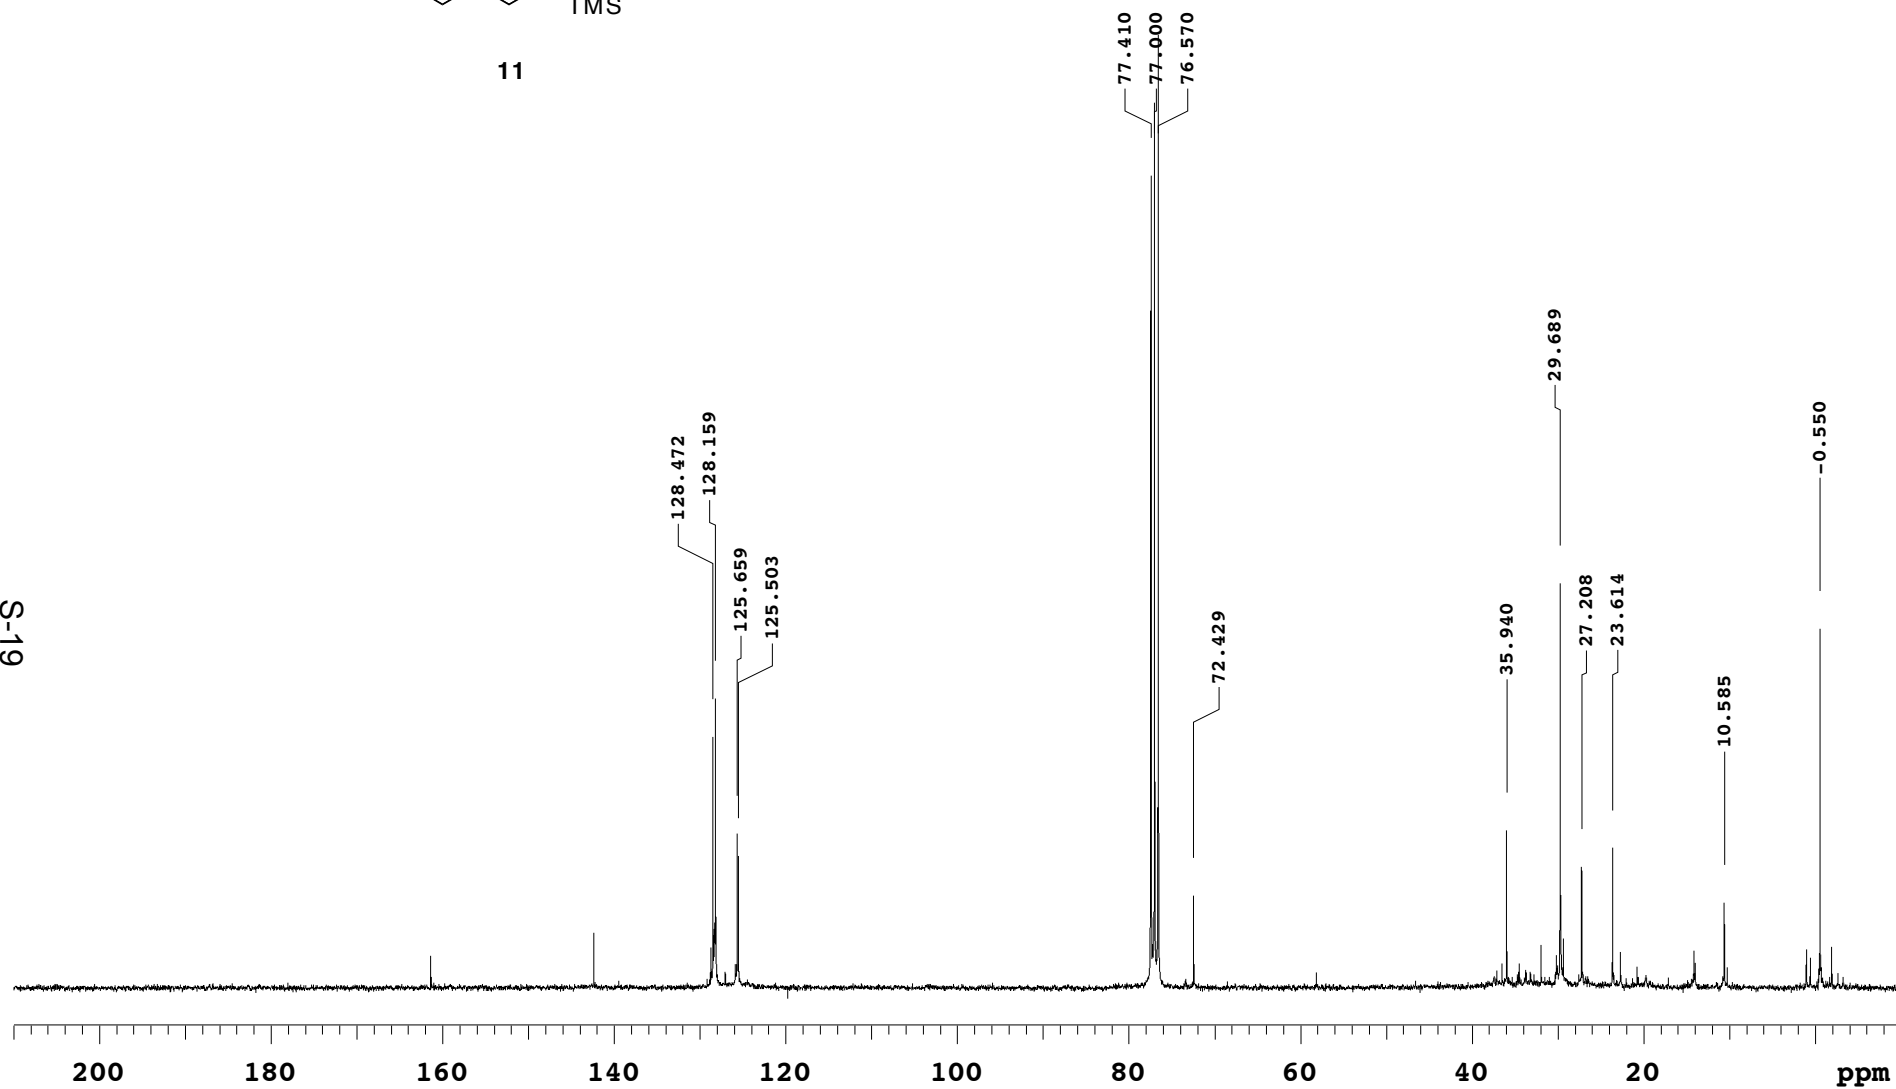

S-19

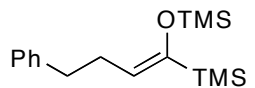

12

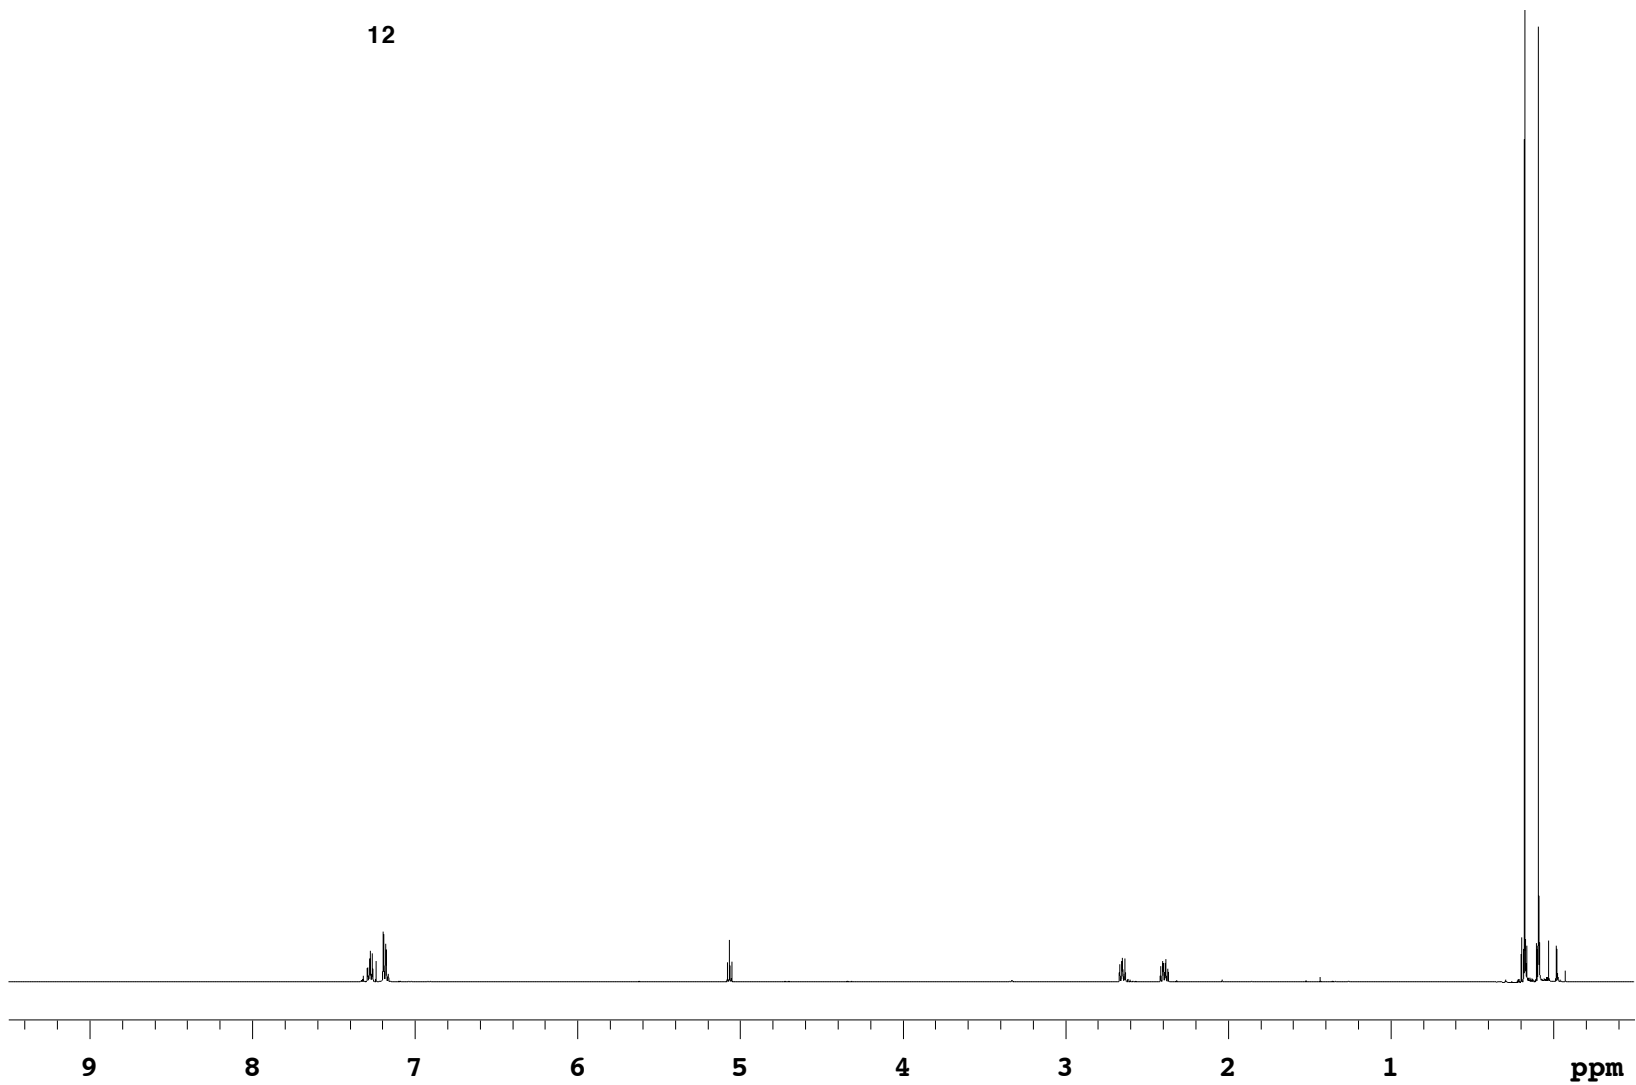

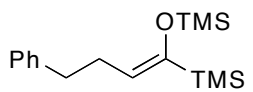

12

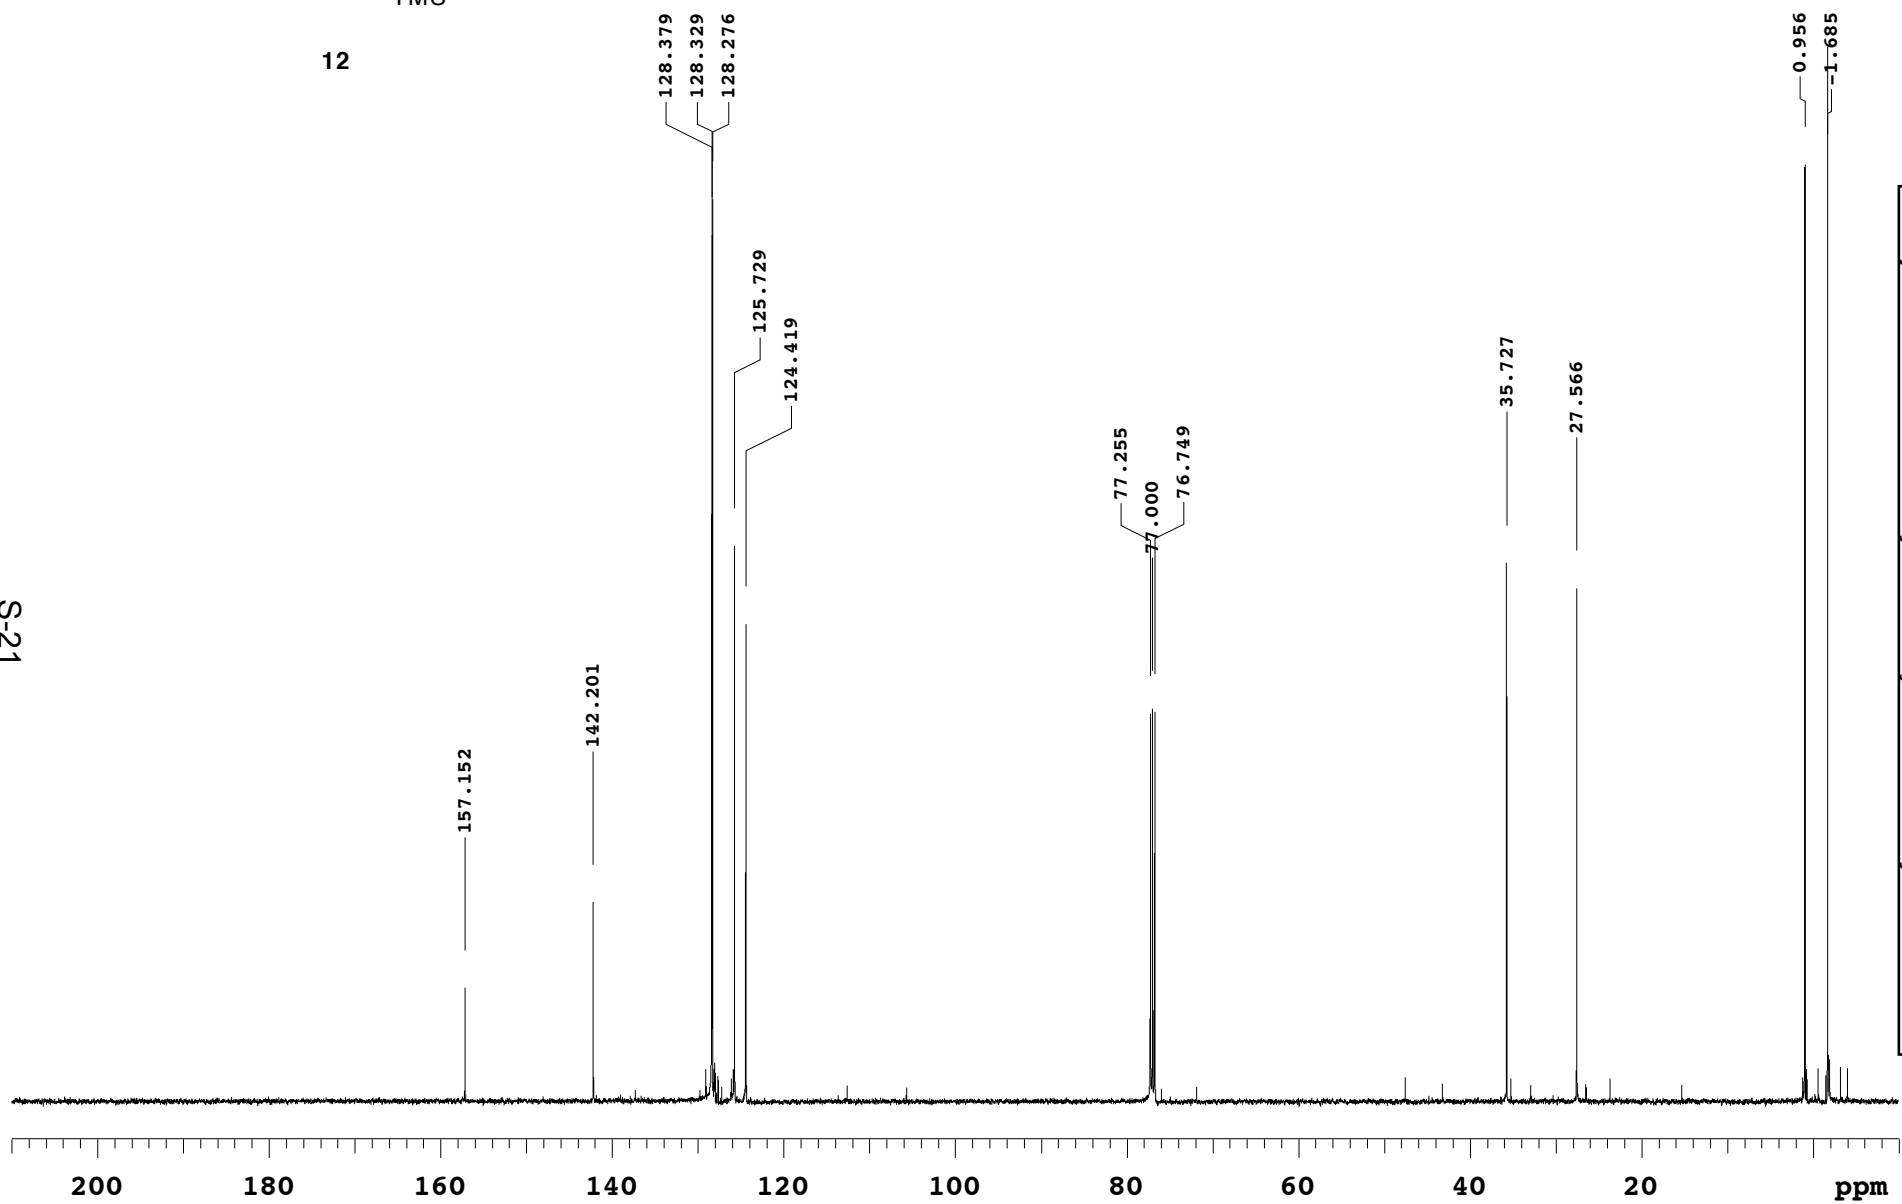

S-21

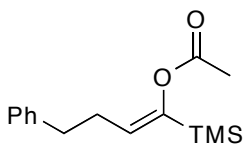

13

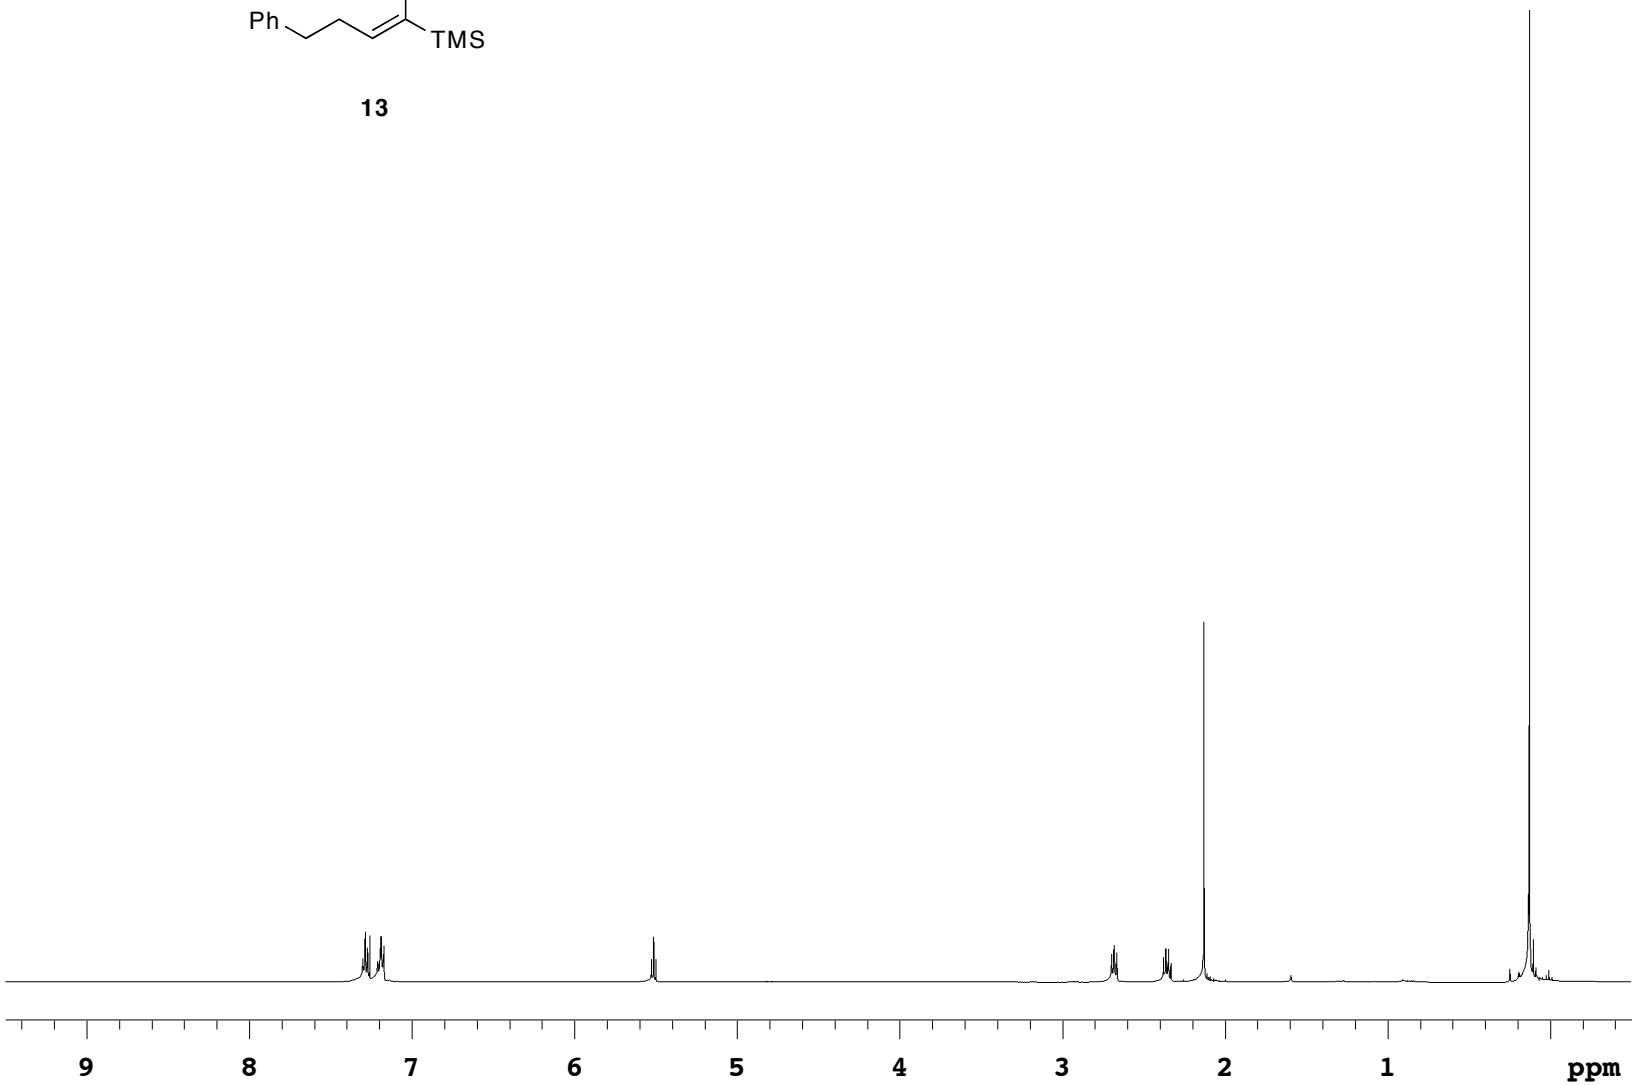

S-22

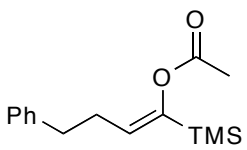

13

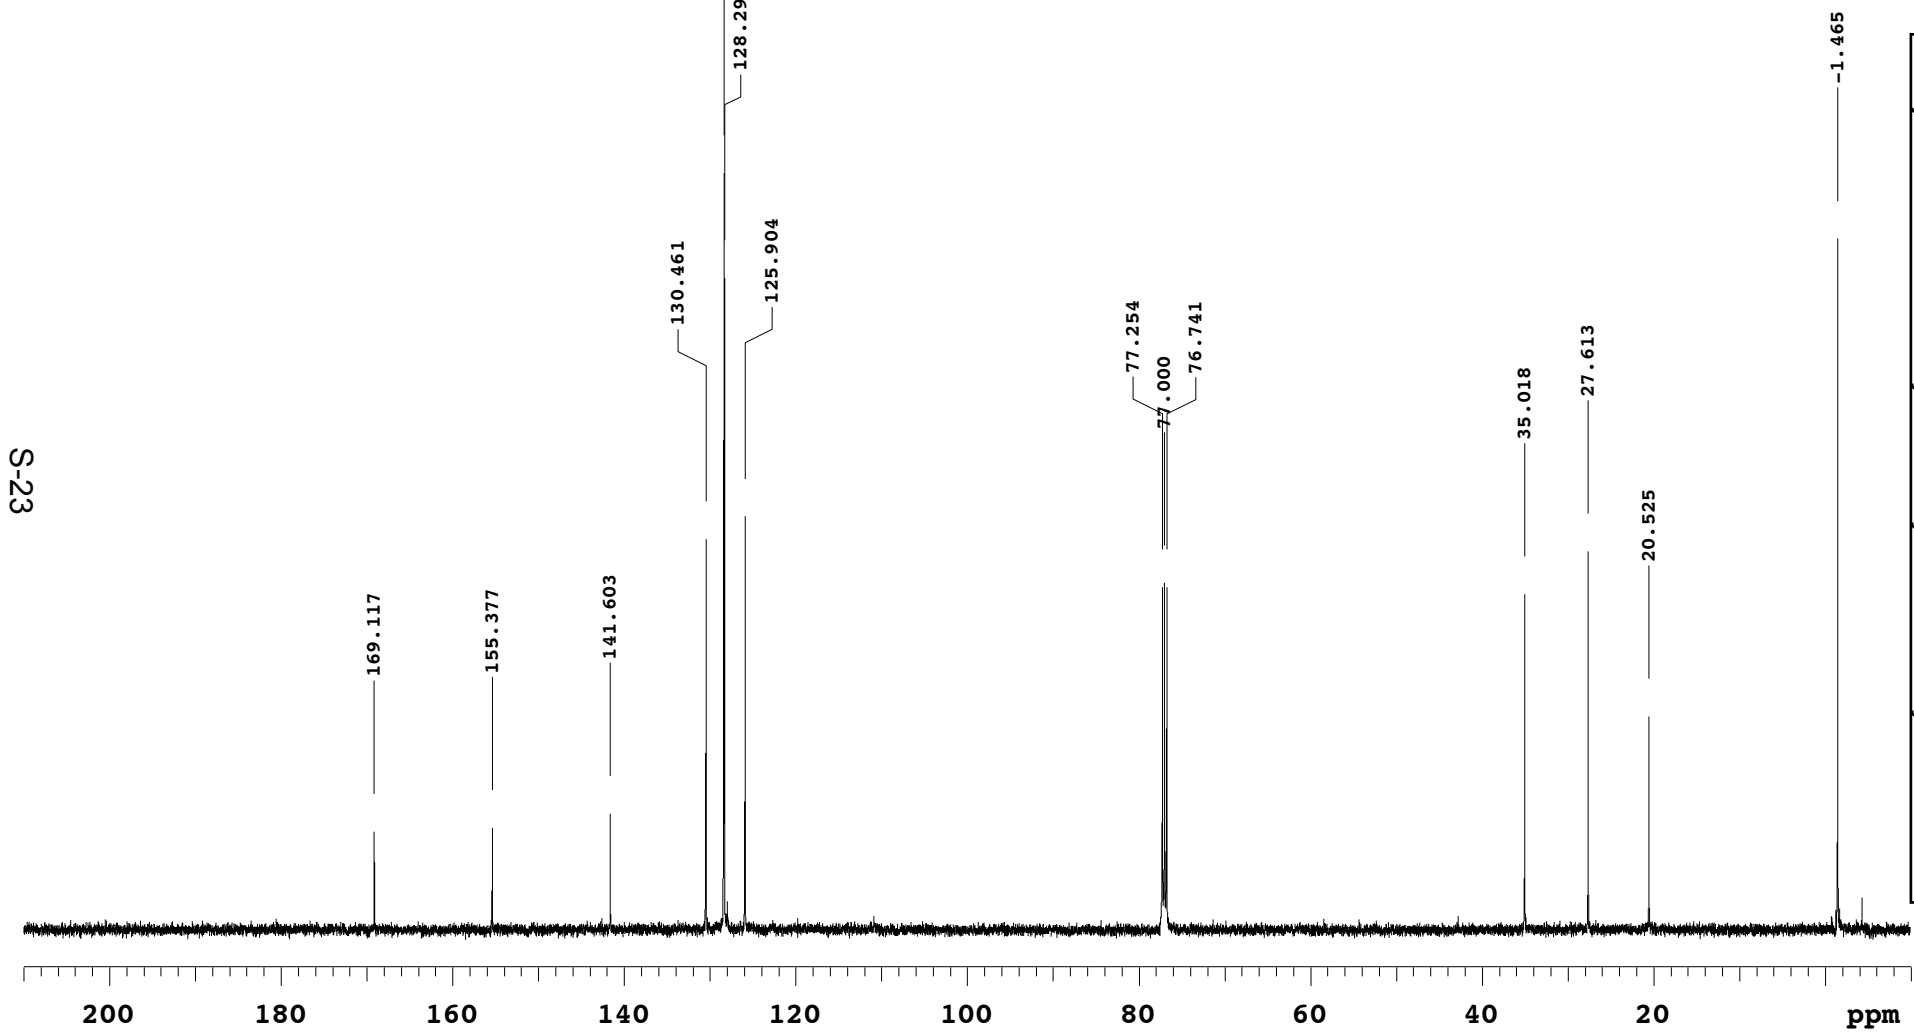

S-23

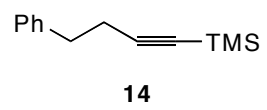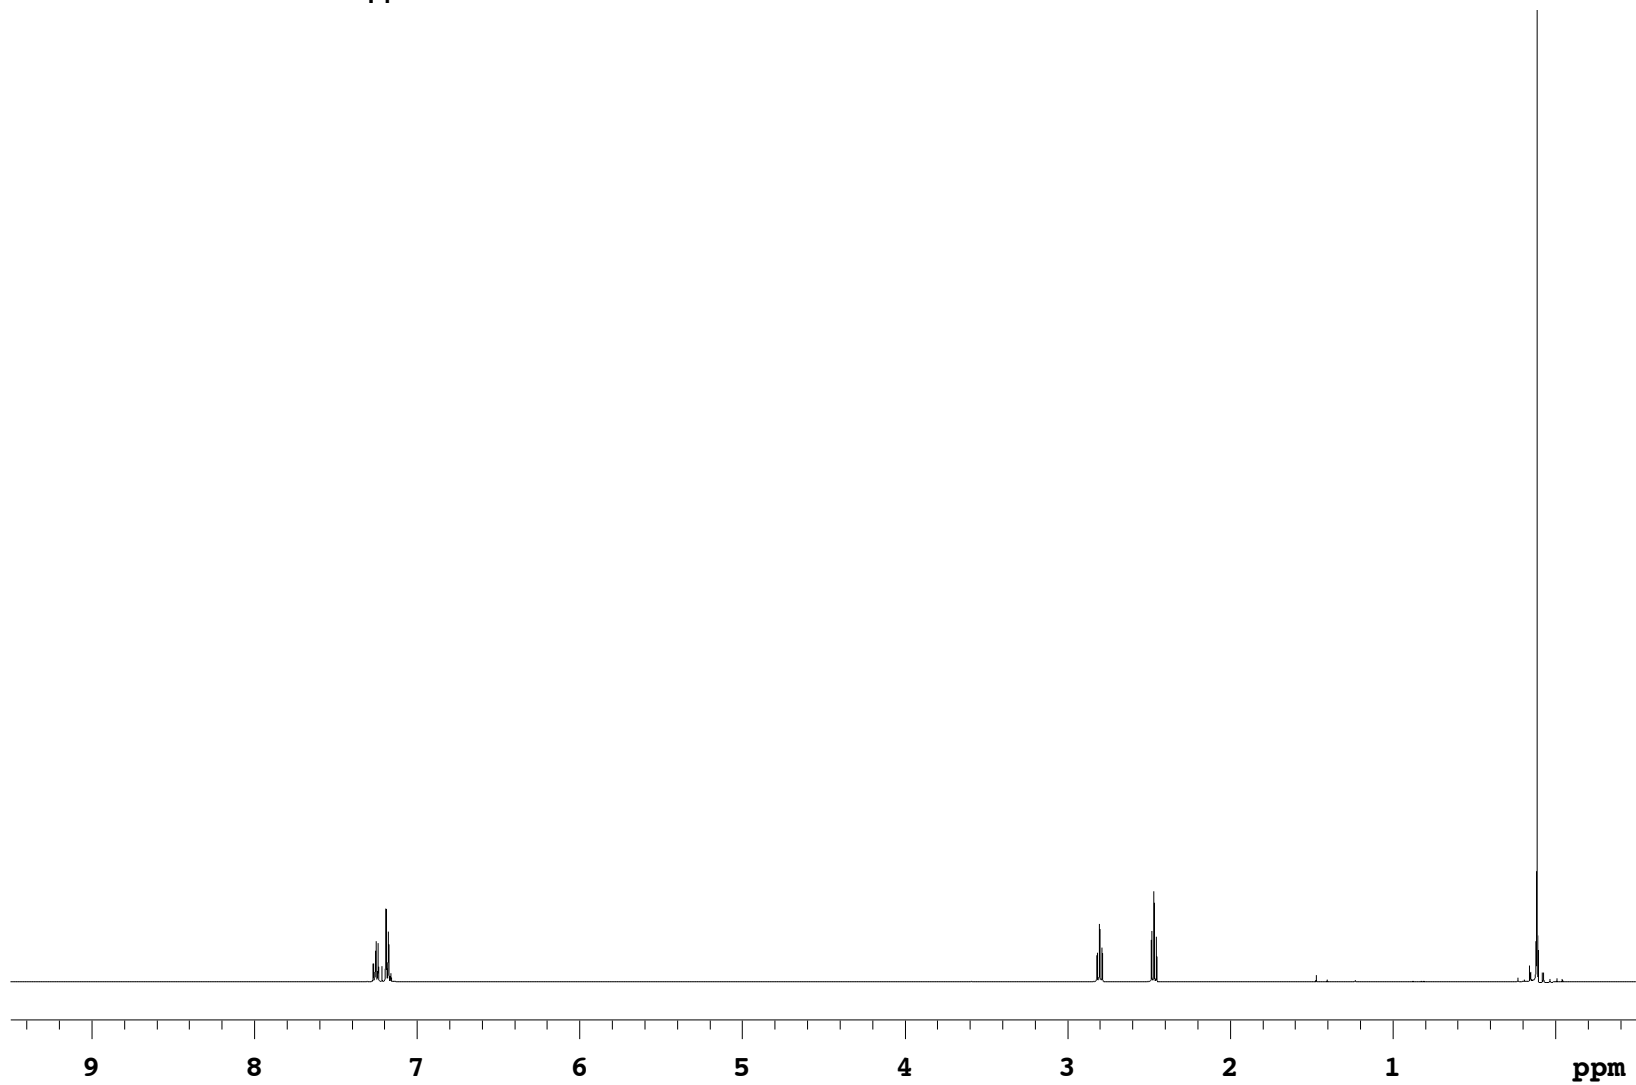



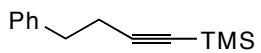

14

TMS

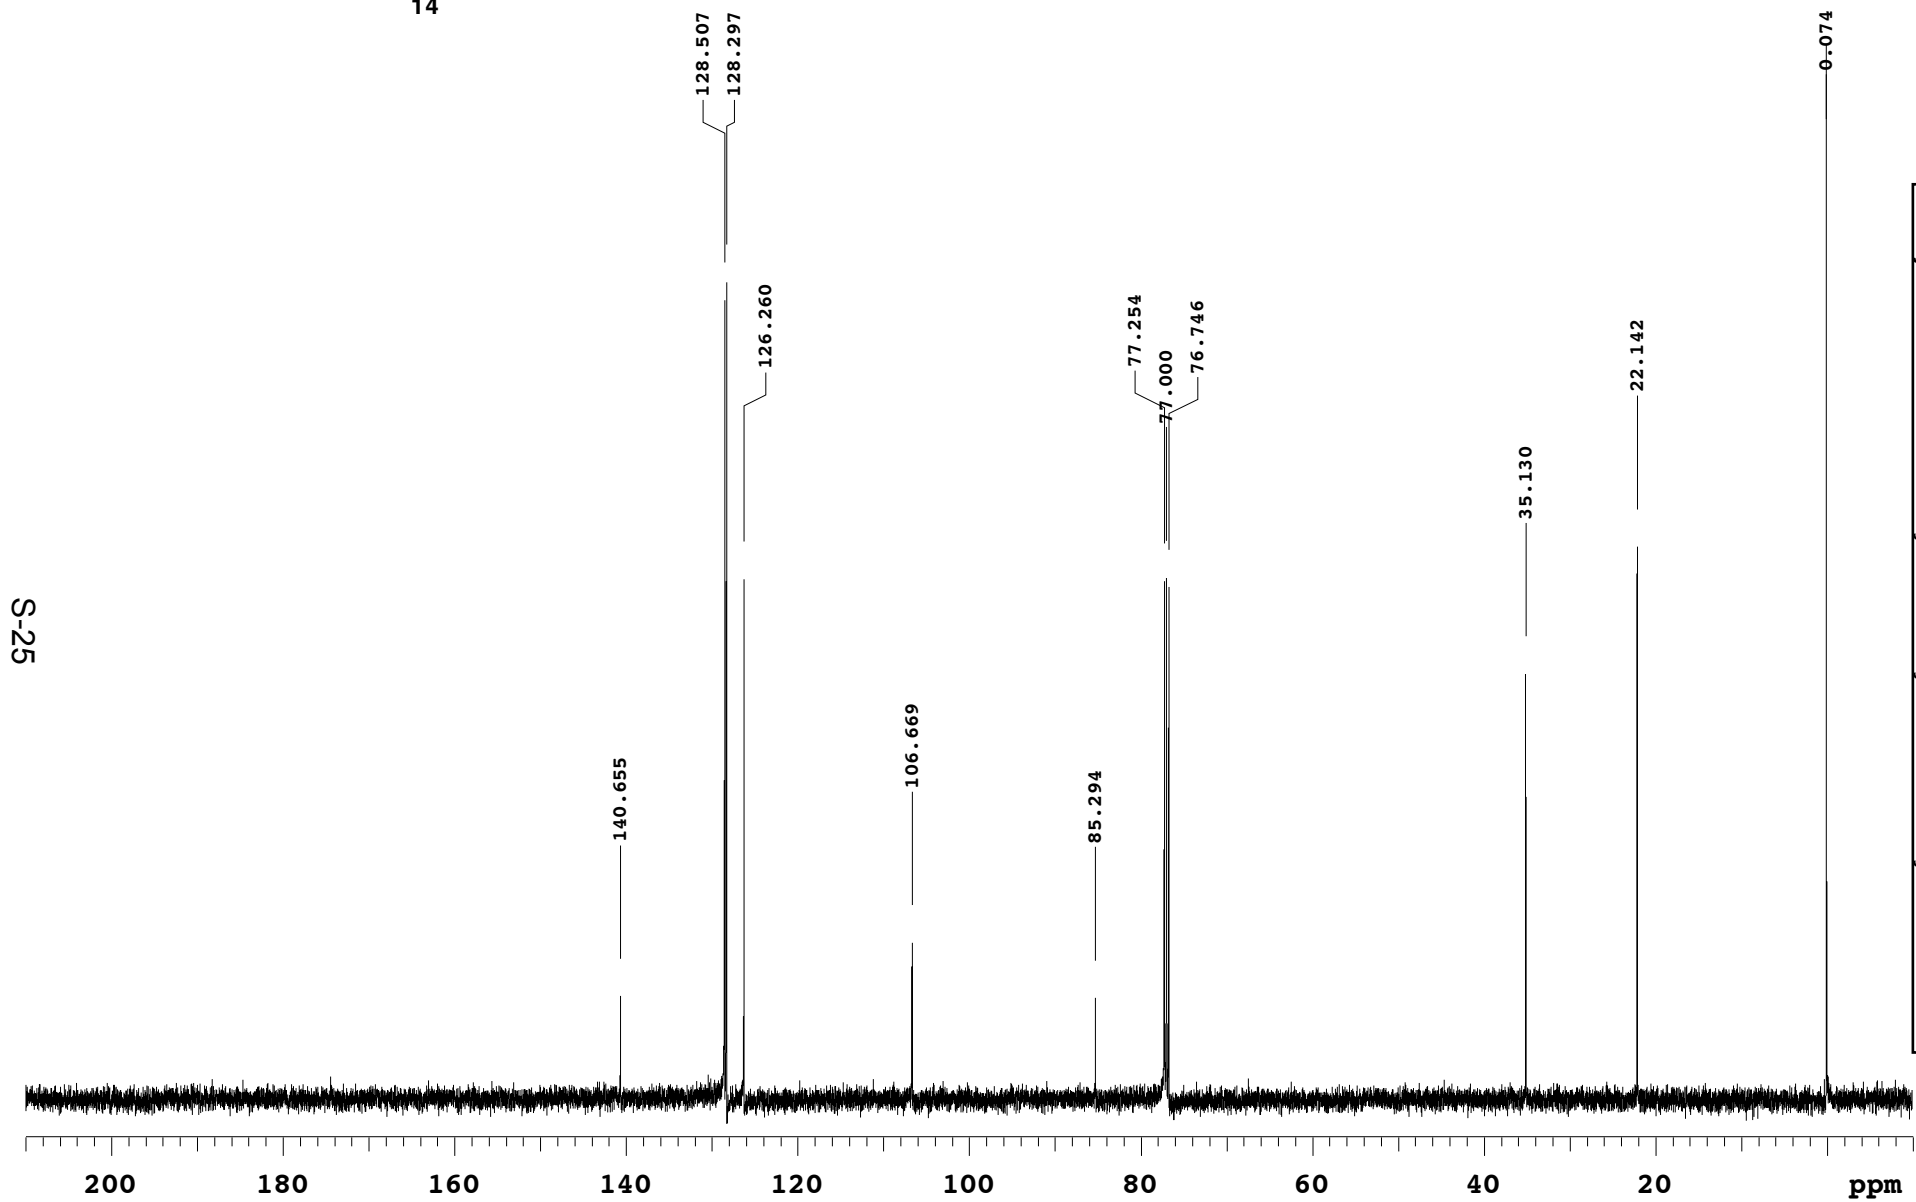

Supplement: b603228a.pdf [file b603228a.pdf]
